# Supplementary material for: Cytotoxic 13,28 Epoxy Bridged Oleanane-Type Triterpenoid Saponins from the Roots of Ardisia crispa
Source: MDPI journal article supplement (doi:10.3390/molecules27031061), 2022-02-04
Supplement: s1 [file s1]

## Supporting Information

### Cytotoxic 13,28 epoxy bridged oleanane-type triterpenoid saponins from the roots of *Ardisia crispa*

Xin Yin<sup>1</sup>, Rui-hang Hu<sup>1</sup>, Yong-qiang Zhou, Wei-qian Zhu and Ying Zhou\*

*College of Pharmacy, Guizhou University of Traditional Chinese Medicine, Guiyang 550025,  
P. R. China*

### Correspondence

Professor Ying Zhou  
College of Pharmacy, Guizhou University of Traditional Chinese Medicine  
Dongqing Road, Huaxi District, Guiyang 550025, P.R. China  
E-mail: Yingzhou71@sina.com

<sup>1</sup> These authors contributed equally to this work

## Legends for Supplementary Figures

|                        |                                                                   |
|------------------------|-------------------------------------------------------------------|
| <b>Figure S1:</b>      | <sup>1</sup> H-NMR Spectrum of Compound <b>1</b>                  |
| <b>Figure S2-S4</b>    | <sup>1</sup> H-NMR extended spectrum of Compound <b>1</b>         |
| <b>Figure S5:</b>      | <sup>13</sup> C NMR spectrum of Compound <b>1</b>                 |
| <b>Figure S6-S7</b>    | <sup>13</sup> C NMR extended spectrum of Compound <b>1</b>        |
| <b>Figure S8:</b>      | DEPT-135 spectrum of Compound <b>1</b>                            |
| <b>Figure S9:</b>      | HSQC spectrum of Compound <b>1</b>                                |
| <b>Figure S10:</b>     | <sup>1</sup> H- <sup>1</sup> H COSY spectrum of Compound <b>1</b> |
| <b>Figure S11:</b>     | HMBC spectrum of Compound <b>1</b>                                |
| <b>Figure S12:</b>     | NOESY spectrum of Compound <b>1</b>                               |
| <b>Figure S13:</b>     | HR-ESI-MS spectrum of Compound <b>1</b>                           |
| <b>Figure S14:</b>     | ESI-MS spectrum of Compound <b>1</b>                              |
| <b>Figure S15:</b>     | <sup>1</sup> H-NMR Spectrum of Compound <b>2</b>                  |
| <b>Figure S16-S19:</b> | <sup>1</sup> H-NMR extended spectrum of Compound <b>2</b>         |
| <b>Figure S20:</b>     | <sup>13</sup> C NMR spectrum of Compound <b>2</b>                 |
| <b>Figure S21-22:</b>  | <sup>13</sup> C NMR extended spectrum of Compound <b>2</b>        |
| <b>Figure S23:</b>     | DEPT-135 spectrum of Compound <b>2</b>                            |
| <b>Figure S24:</b>     | HSQC spectrum of Compound <b>2</b>                                |
| <b>Figure S25:</b>     | <sup>1</sup> H- <sup>1</sup> H COSY spectrum of Compound <b>2</b> |
| <b>Figure S26:</b>     | HMBC spectrum of Compound <b>2</b>                                |
| <b>Figure S27:</b>     | NOESY spectrum of Compound <b>2</b>                               |
| <b>Figure S28:</b>     | HR-ESI-MS spectrum of Compound <b>2</b>                           |
| <b>Figure S29:</b>     | ESI-MS spectrum of Compound <b>2</b>                              |
| <b>Figure S30:</b>     | <sup>1</sup> H-NMR Spectrum of Compound <b>3</b>                  |
| <b>Figure S31-32:</b>  | <sup>1</sup> H-NMR extended spectrum of Compound <b>3</b>         |
| <b>Figure S33:</b>     | <sup>13</sup> C NMR spectrum of Compound <b>3</b>                 |
| <b>Figure S34-35:</b>  | <sup>13</sup> C NMR extended spectrum of Compound <b>3</b>        |
| <b>Figure S36:</b>     | DEPT-135 spectrum of Compound <b>3</b>                            |
| <b>Figure S37:</b>     | HSQC spectrum of Compound <b>3</b>                                |
| <b>Figure S38:</b>     | <sup>1</sup> H- <sup>1</sup> H COSY spectrum of Compound <b>3</b> |
| <b>Figure S39:</b>     | HMBC spectrum of Compound <b>3</b>                                |

- Figure S40:** NOESY spectrum of Compound **3**
- Figure S41:** HR-ESI-MS spectrum of Compound **3**
- Figure S42:** ESI-MS spectrum of Compound **3**
- Figure S43:**  $^1\text{H}$ -NMR spectrum of Compound **4**
- Figure S44:**  $^{13}\text{C}$  NMR spectrum of Compound **4**
- Figure S45:**  $^1\text{H}$ -NMR spectrum of Compound **5**
- Figure S46:**  $^{13}\text{C}$  NMR spectrum of Compound **5**
- Figure S47:**  $^1\text{H}$ -NMR spectrum of Compound **6**
- Figure S48:**  $^{13}\text{C}$  NMR spectrum of Compound **6**
- Figure S49:**  $^1\text{H}$ -NMR spectrum of Compound **7**
- Figure S50:**  $^{13}\text{C}$  NMR spectrum of Compound **7**

### **Legends for Supplementary Table**

**Table S1**  $^{13}\text{C}$ -NMR (100 MHz) Data of **4-7** in  $\text{CD}_3\text{OD}$

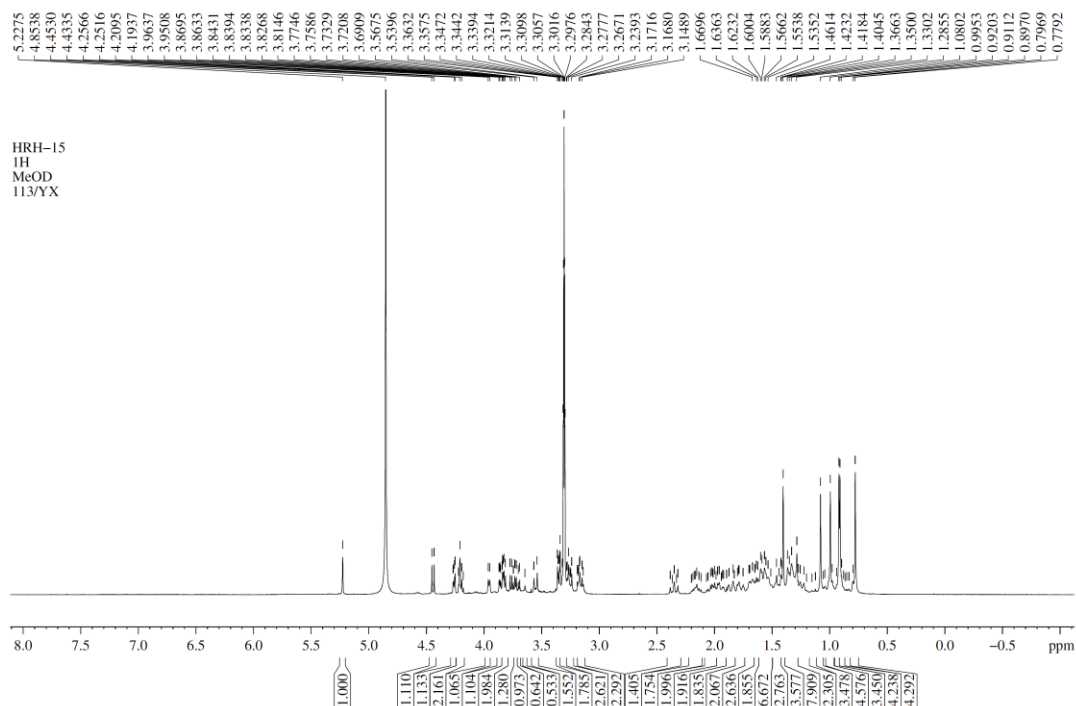

**Figure S1:**  $^1\text{H}$ -NMR spectrum of Compound **1**

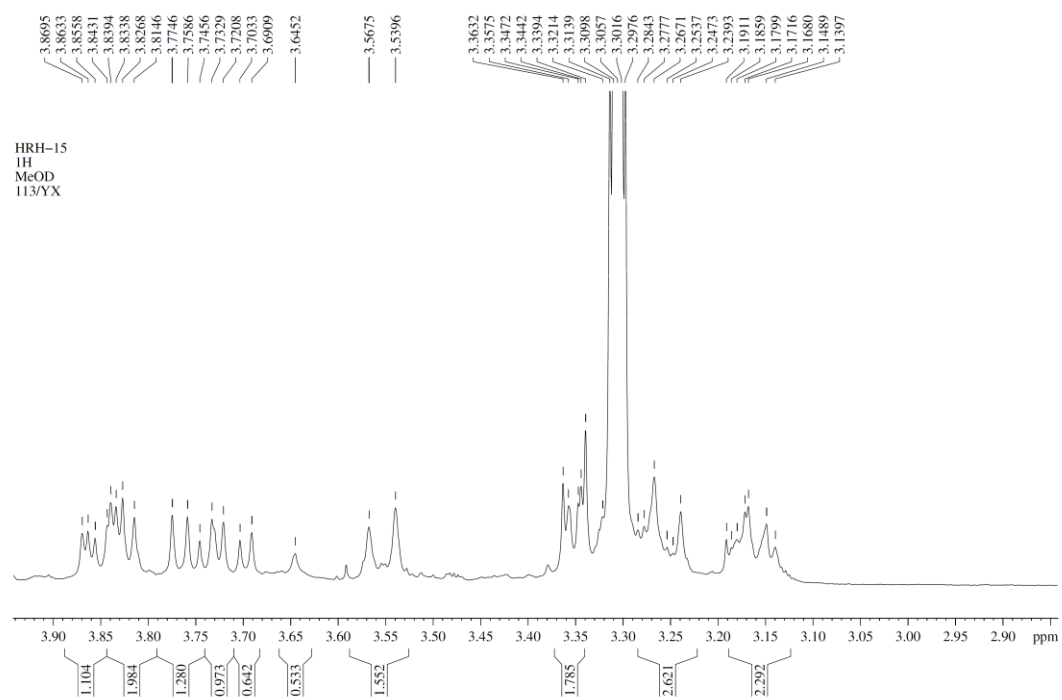

**Figure S2:**  $^1\text{H}$ -NMR extended spectrum of Compound **1**

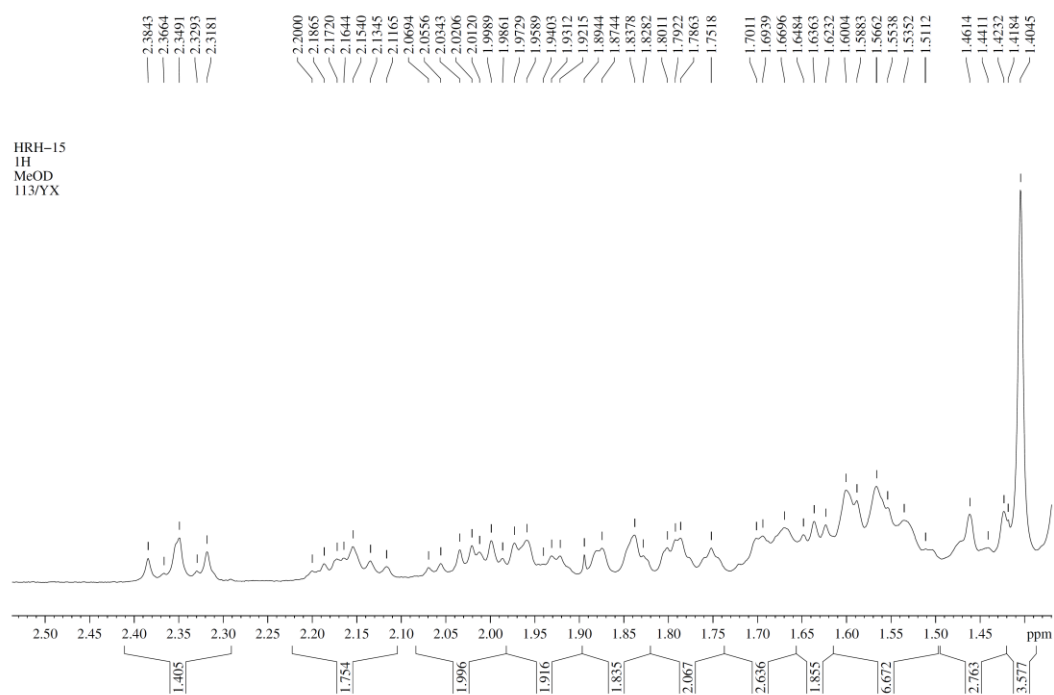

**Figure S3:**  $^1\text{H}$ -NMR extended spectrum of Compound **1**

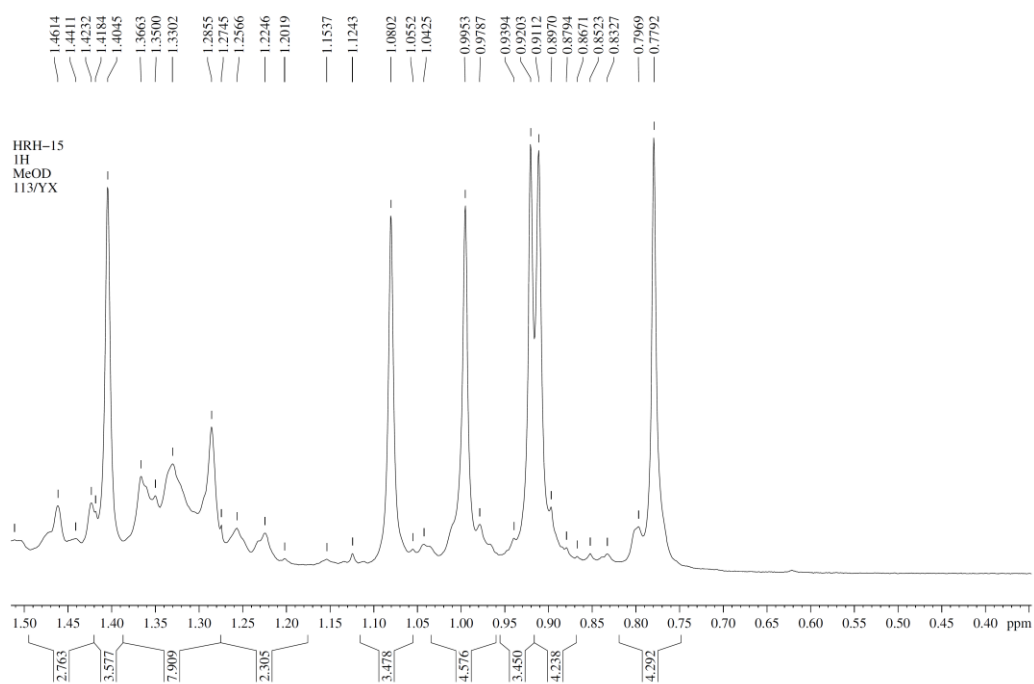

**Figure S4:**  $^1\text{H}$ -NMR extended spectrum of Compound **1**

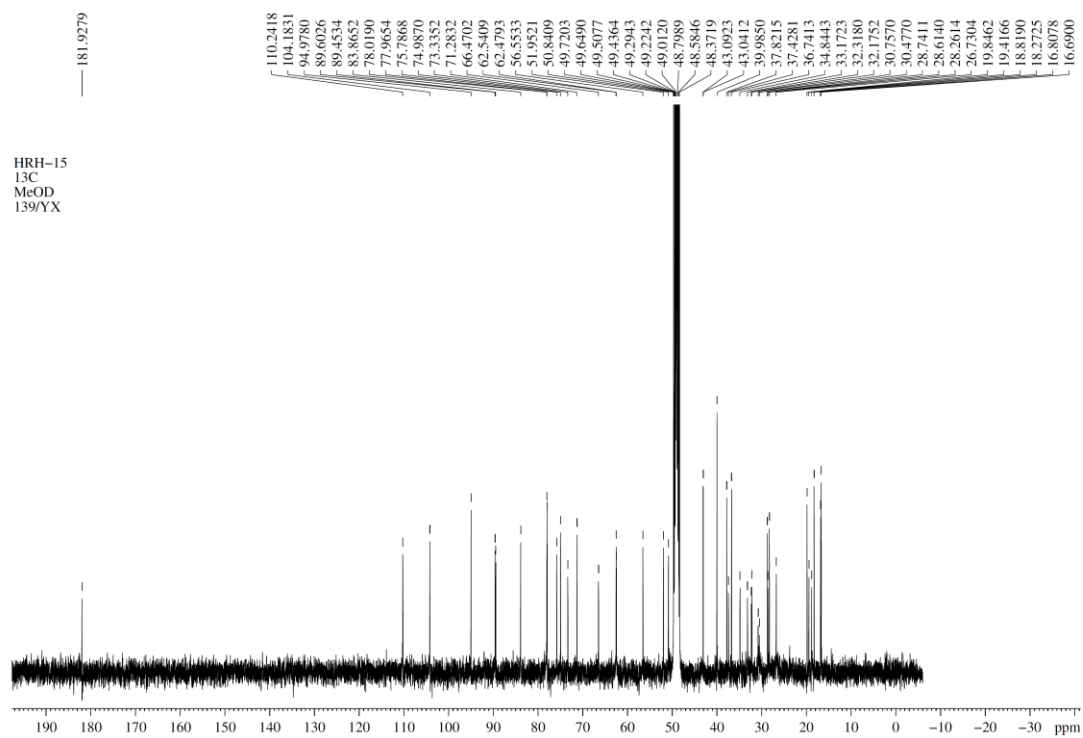

**Figure S5:**  $^{13}\text{C}$  NMR spectrum of Compound **1**



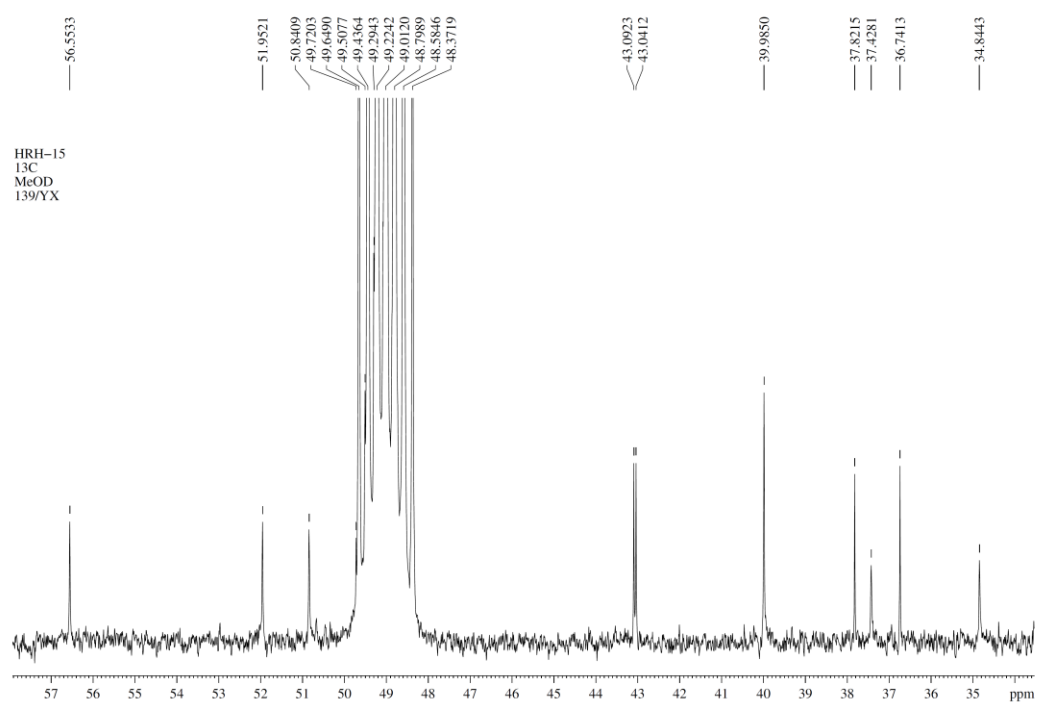

**Figure S6:**  $^{13}\text{C}$  NMR extended spectrum of Compound **1**

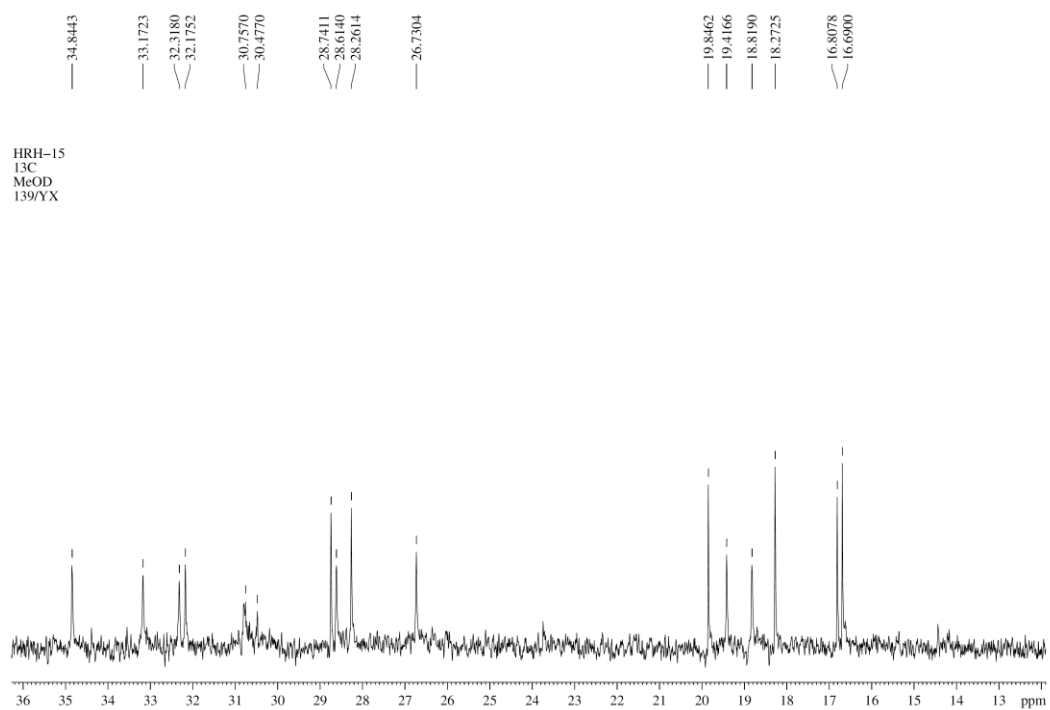

**Figure S7:**  $^{13}\text{C}$  NMR extended spectrum of Compound **1**

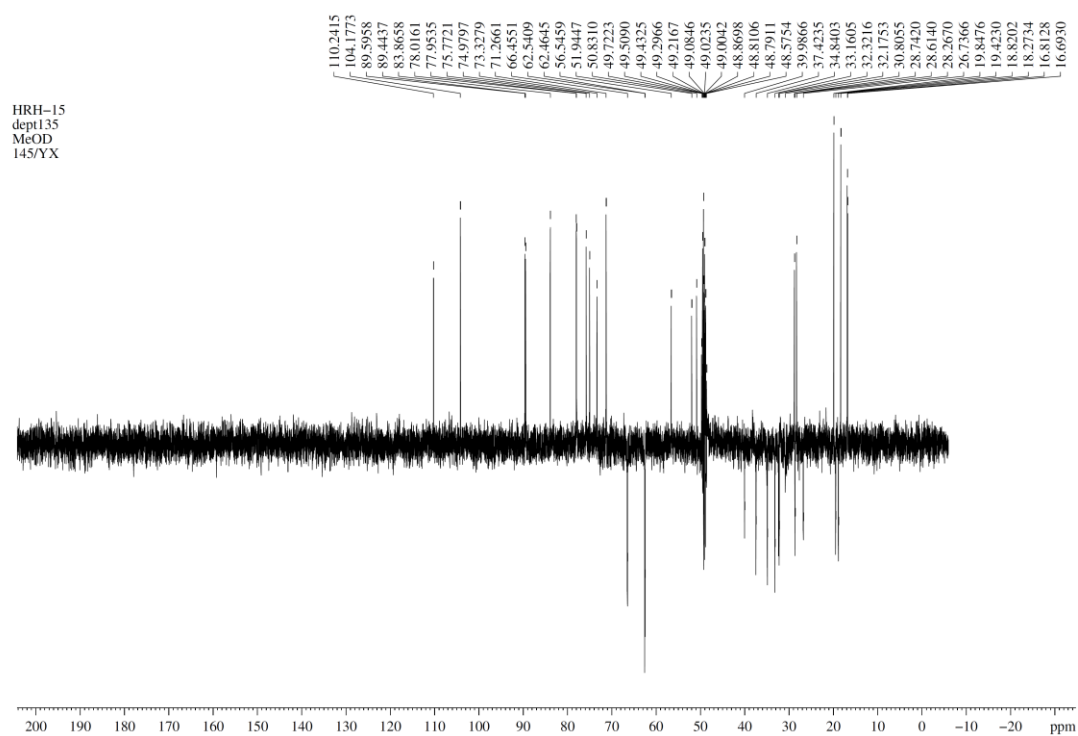

**Figure S8:** DEPT-135 spectrum of Compound **1**

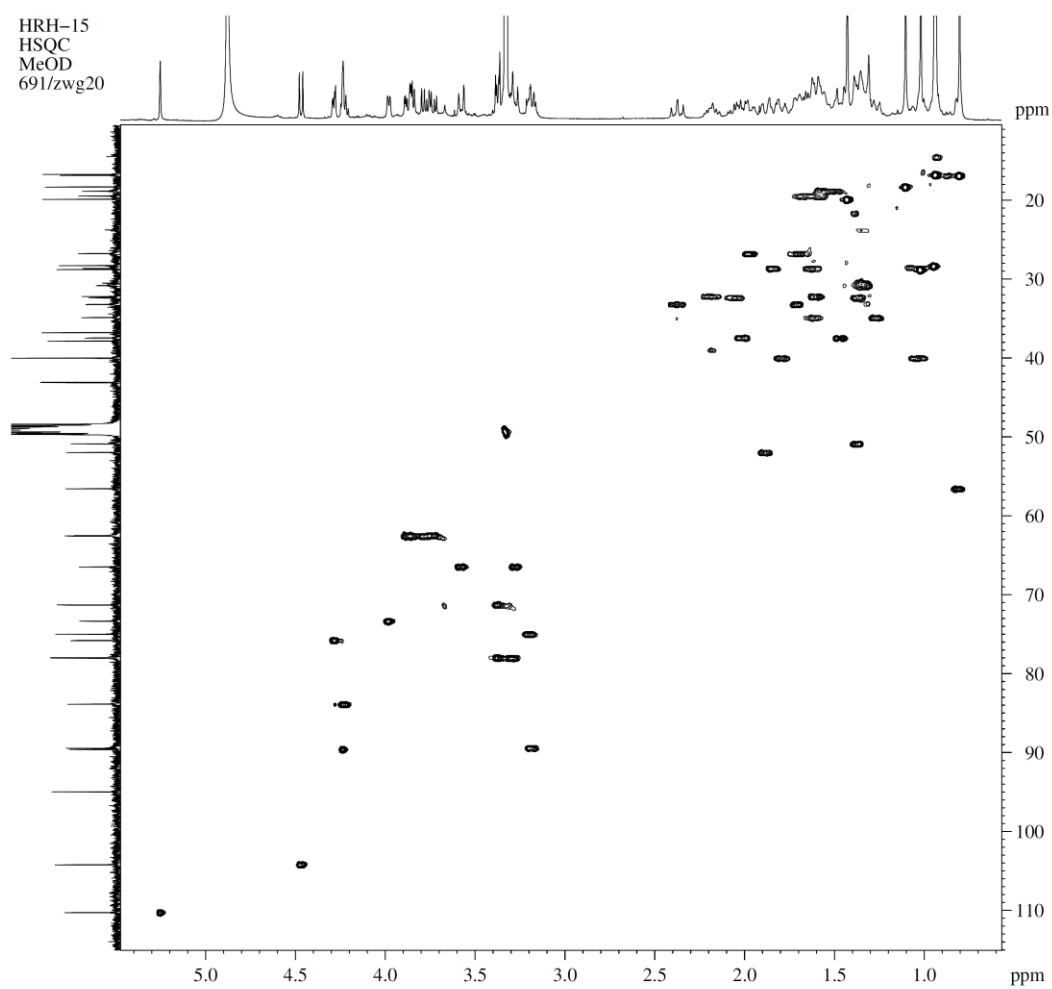

**Figure S9:** HSQC spectrum of Compound **1**

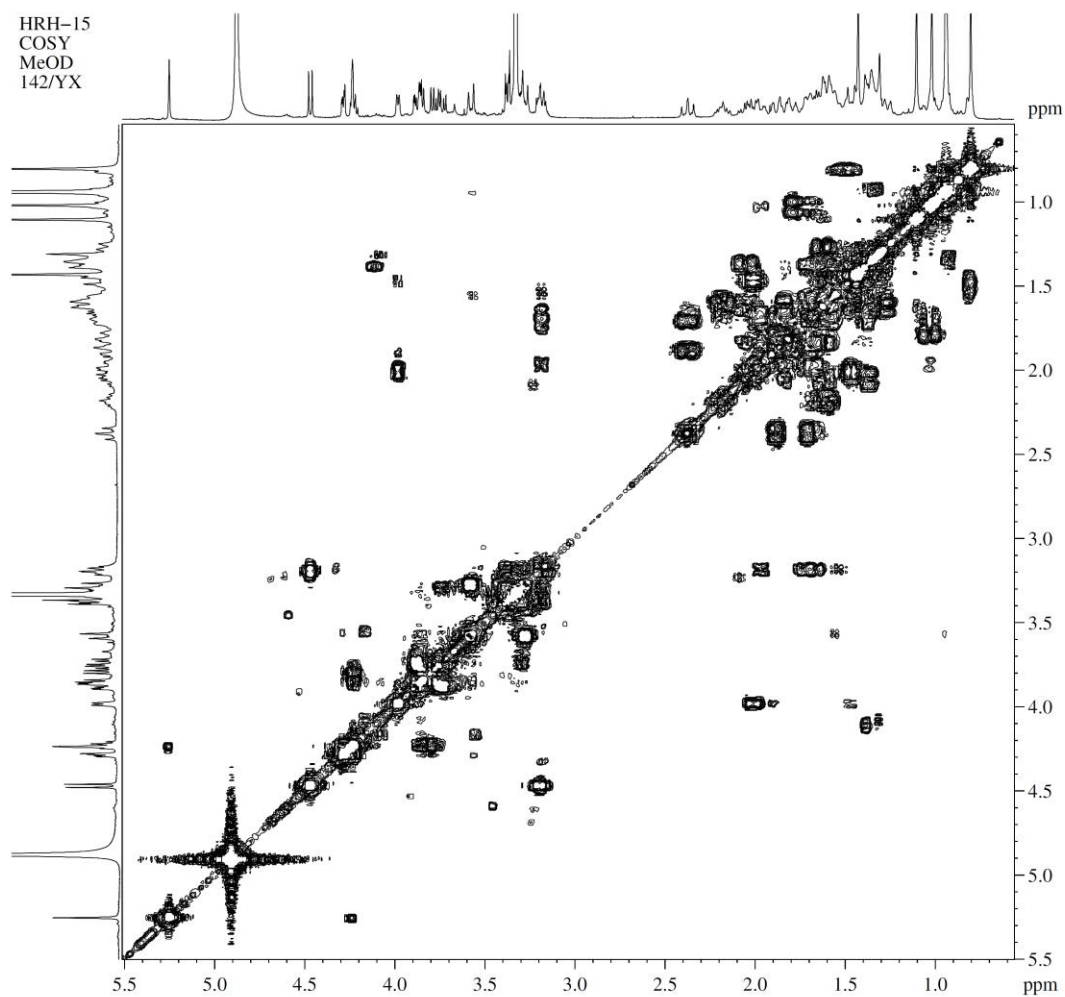

**Figure S10:**  $^1\text{H}$ - $^1\text{H}$  COSY spectrum of Compound **1**

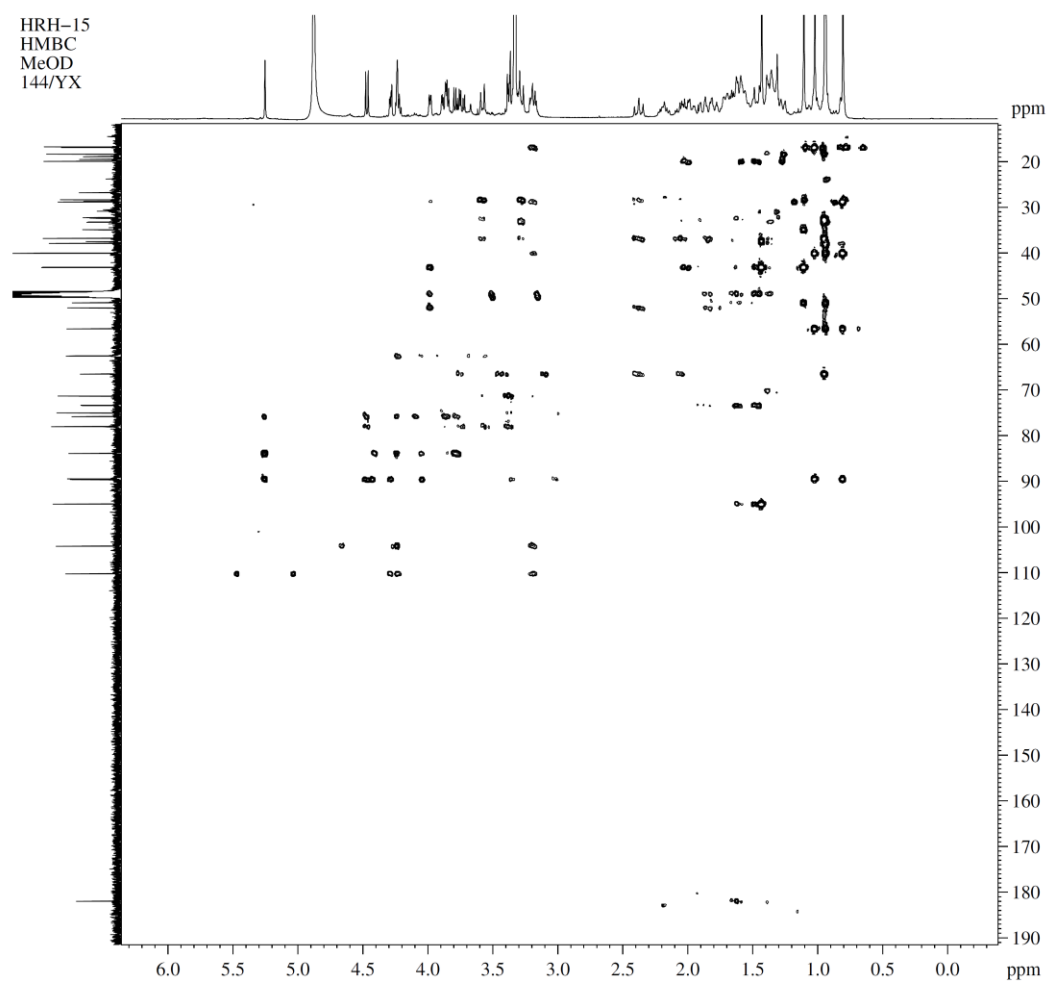

**Figure S11:** HMBC spectrum of Compound **1**

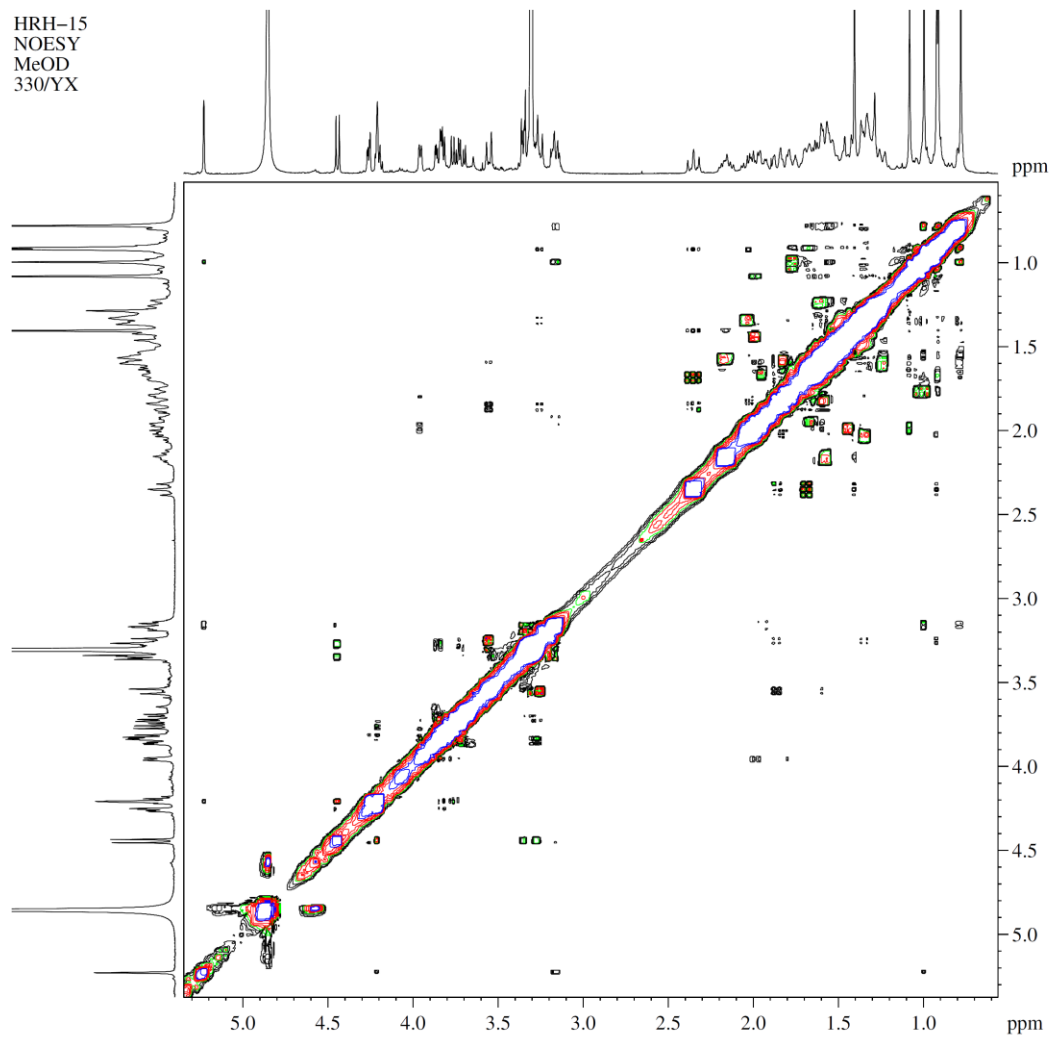

**Figure S12:** NOESY spectrum of Compound **1**

HRH-15 #30 RT: 0.13 AV: 1 NL: 2.32E7  
T: FTMS + p ESI Full ms [100.0000-1500.0000]

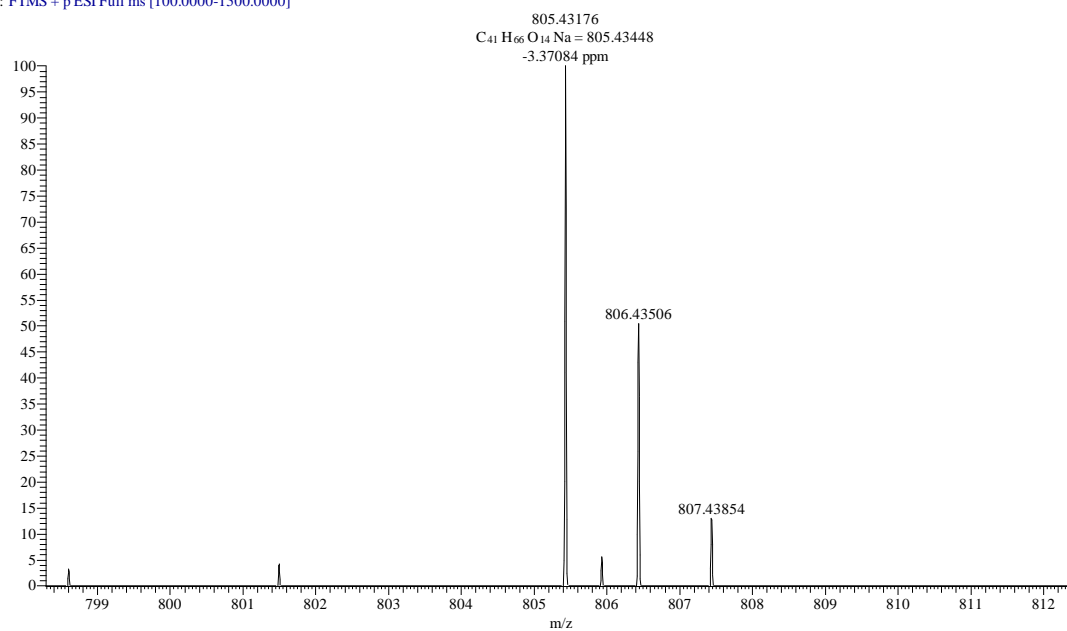

**Figure S13:** HR-ESI-MS spectrum of Compound **1**



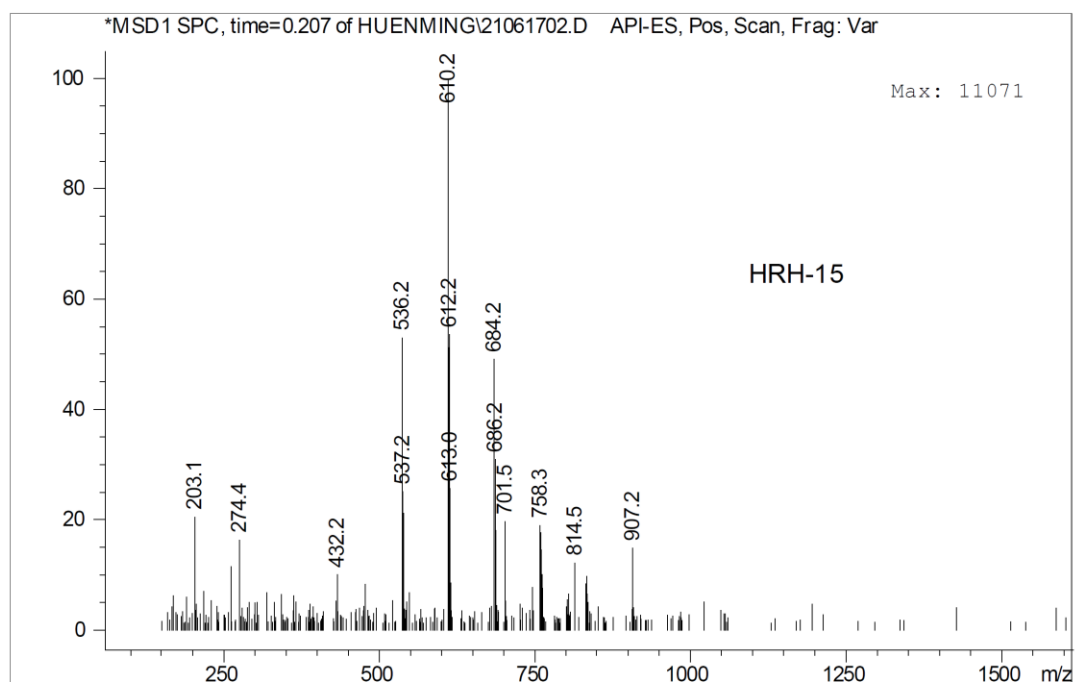

**Figure S14:** ESI-MS spectrum of Compound **1**

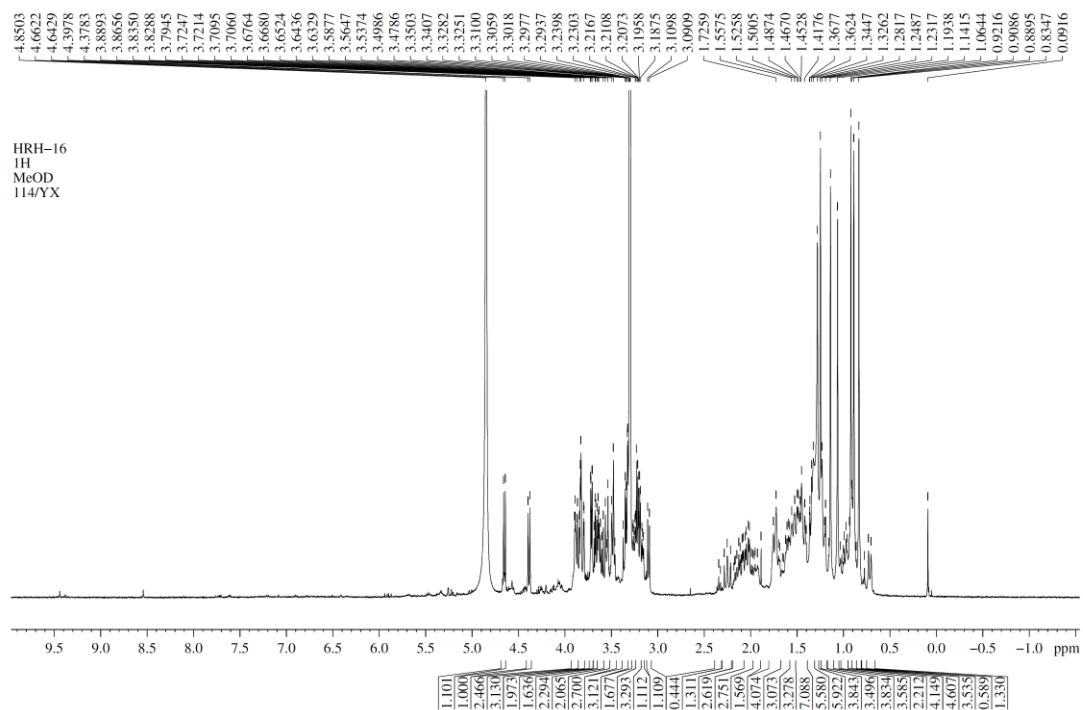

**Figure S15:**  $^1\text{H}$ -NMR spectrum of Compound **2**

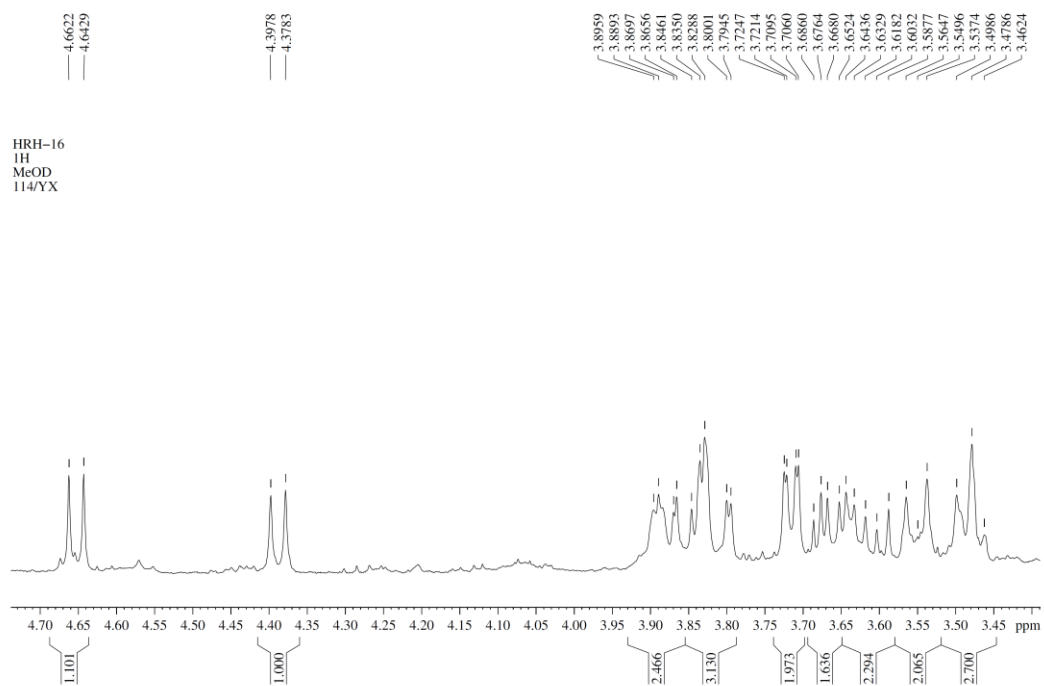

**Figure S16:**  $^1\text{H}$ -NMR extended spectrum of Compound **2**

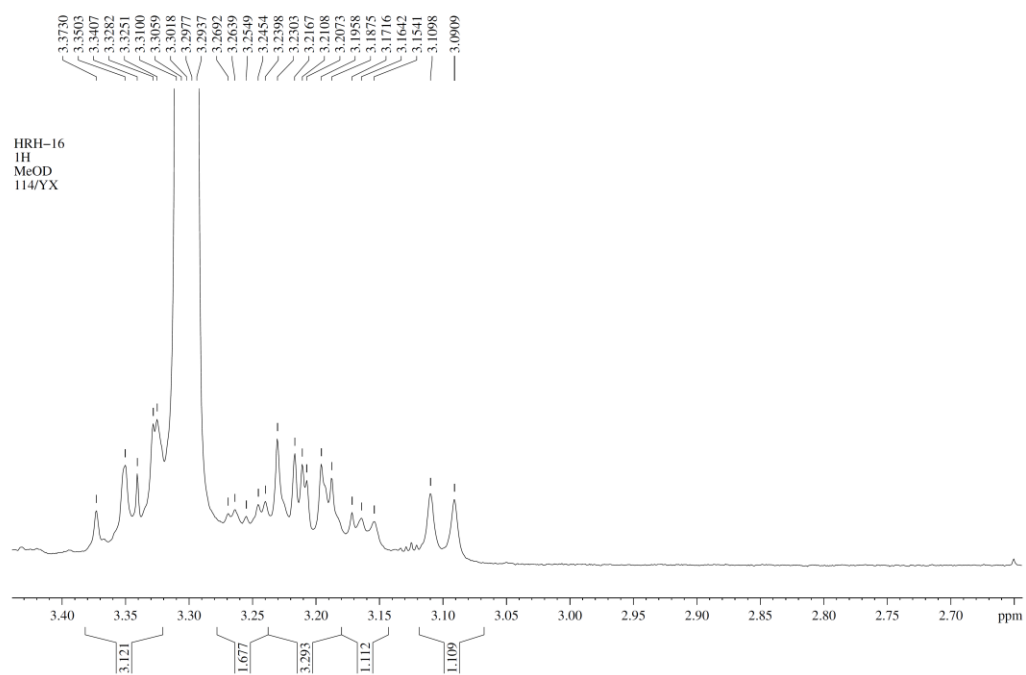

**Figure S17:**  $^1\text{H}$ -NMR extended spectrum of Compound **2**

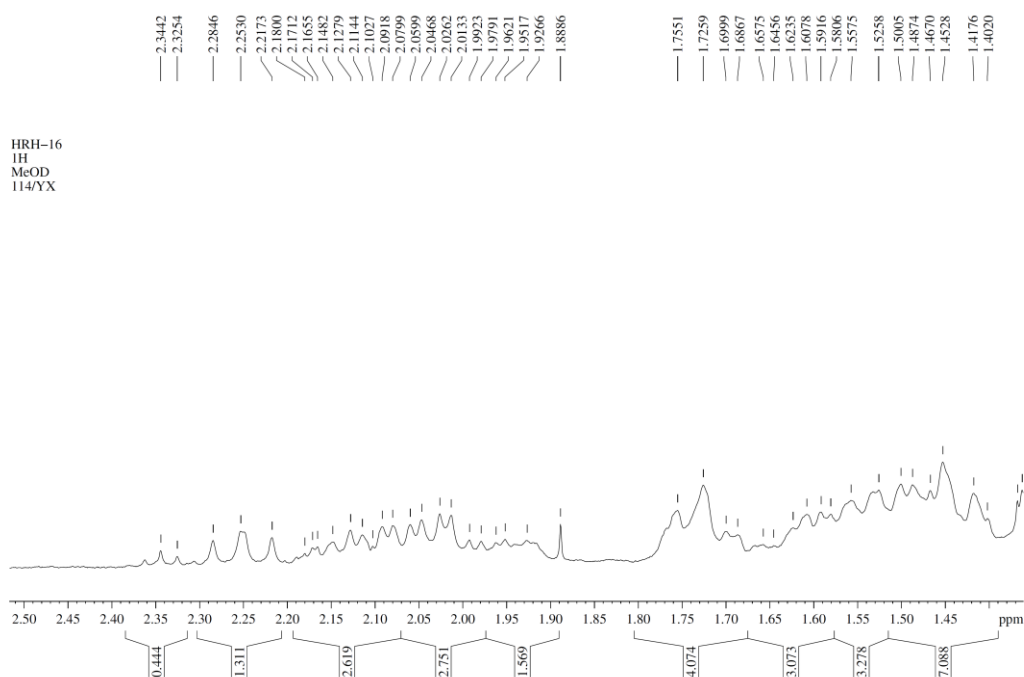

**Figure S18:**  $^1\text{H}$ -NMR extended spectrum of Compound **2**

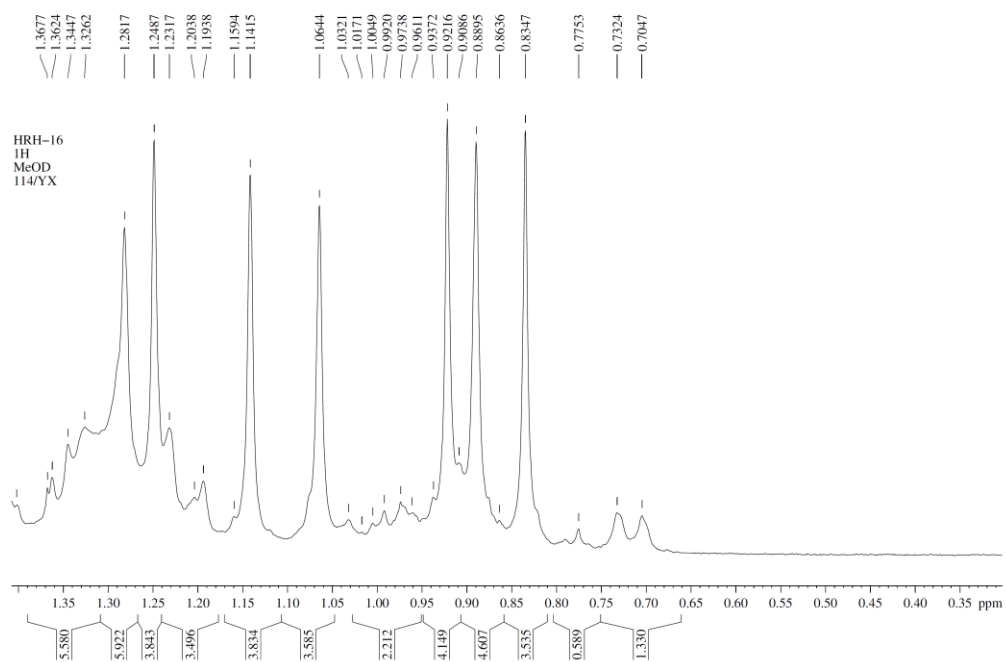

**Figure S19:**  $^1\text{H}$ -NMR extended spectrum of Compound **2**

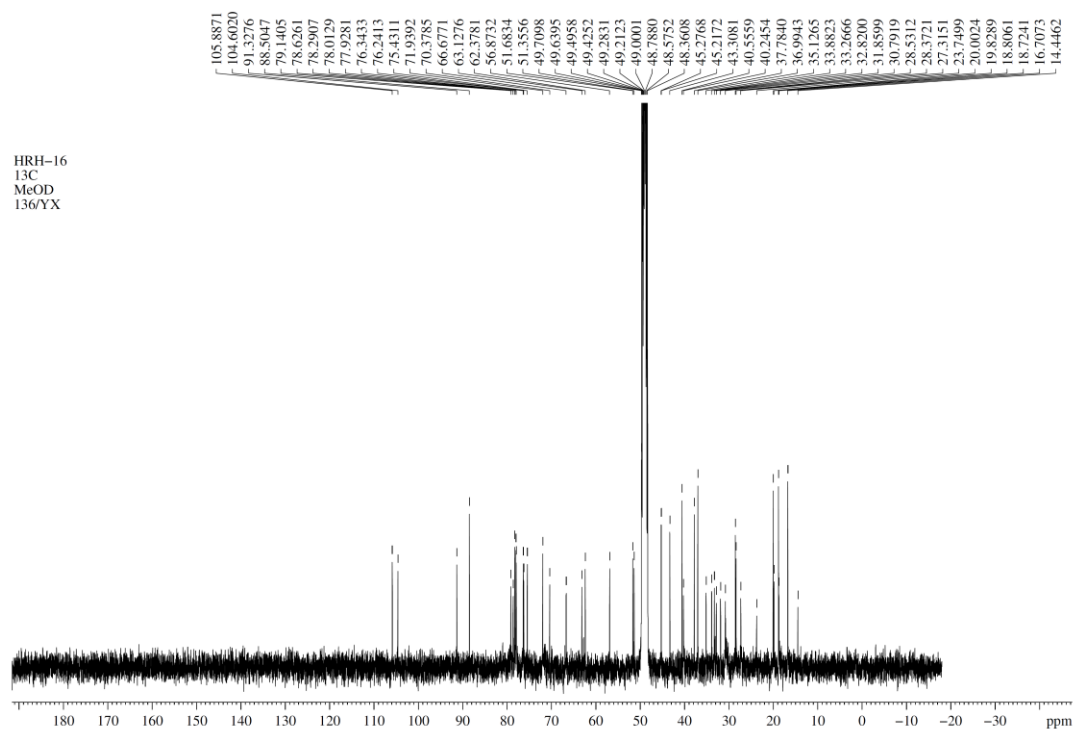

**Figure S20:**  $^{13}\text{C}$  NMR spectrum of Compound **2**

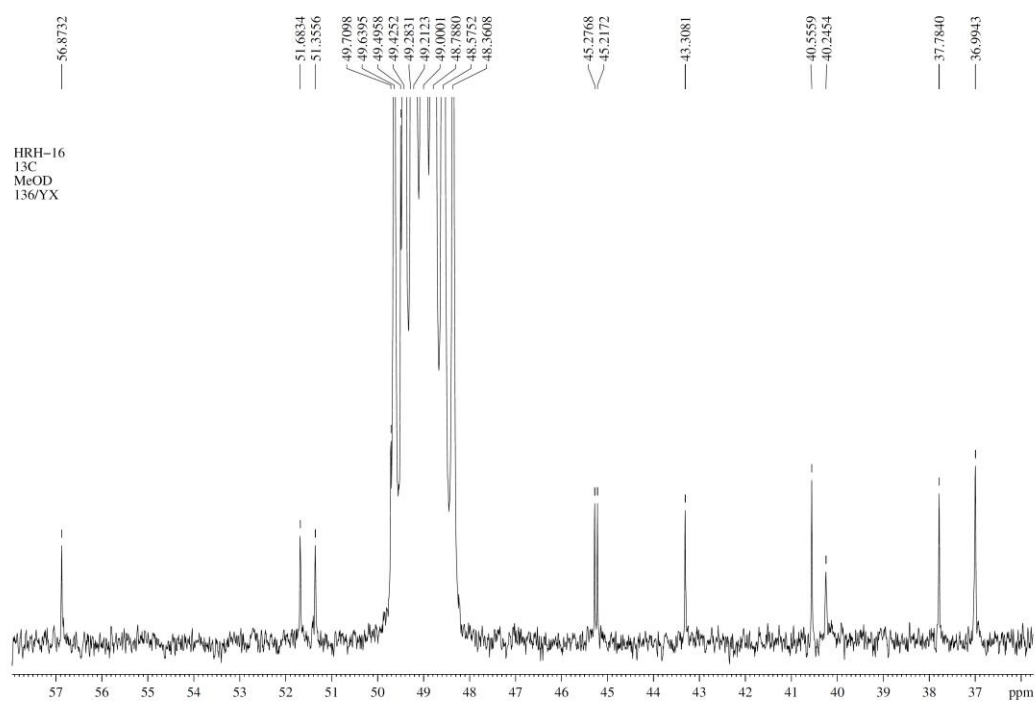

**Figure S21:**  $^{13}\text{C}$  NMR extended spectrum of Compound **2**



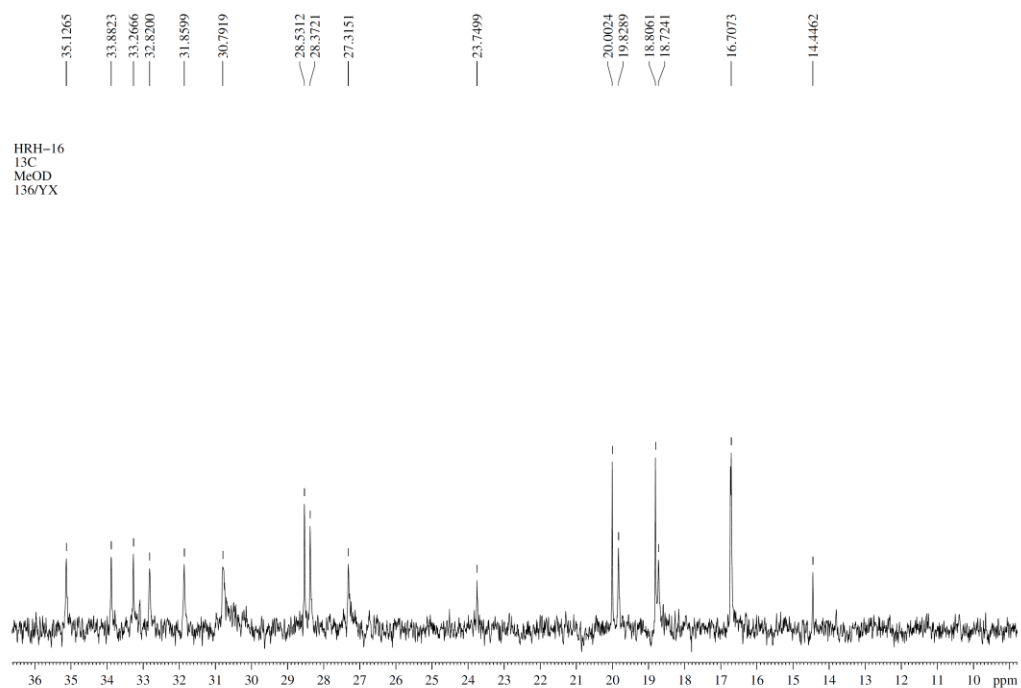

**Figure S22:**  $^{13}\text{C}$  NMR extended spectrum of Compound 2

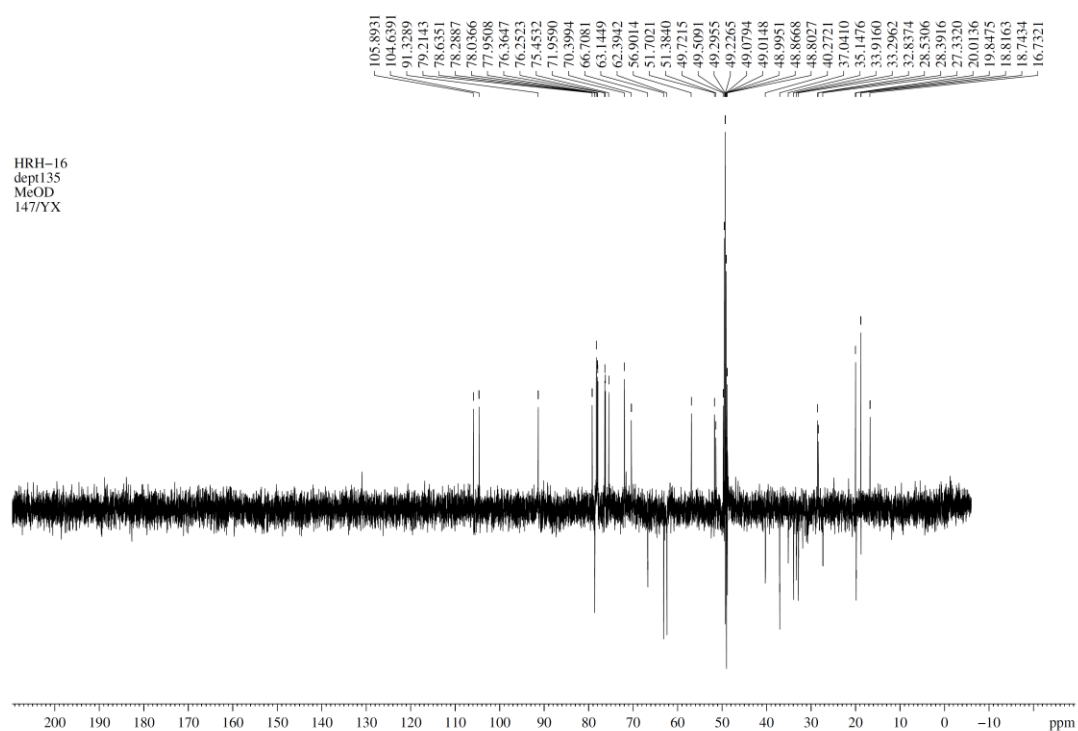

**Figure S23:** DEPT-135 spectrum of Compound **2**

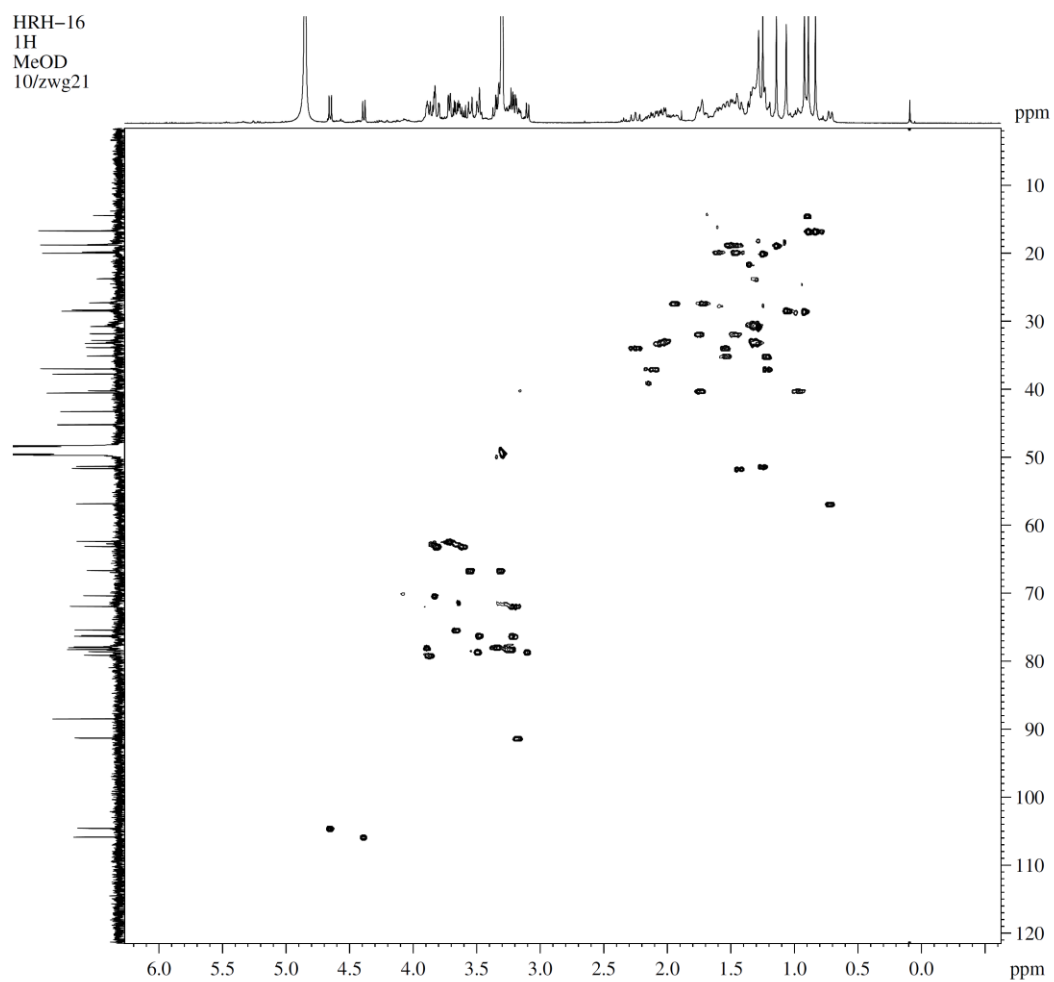

**Figure S24:** HSQC spectrum of Compound **2**

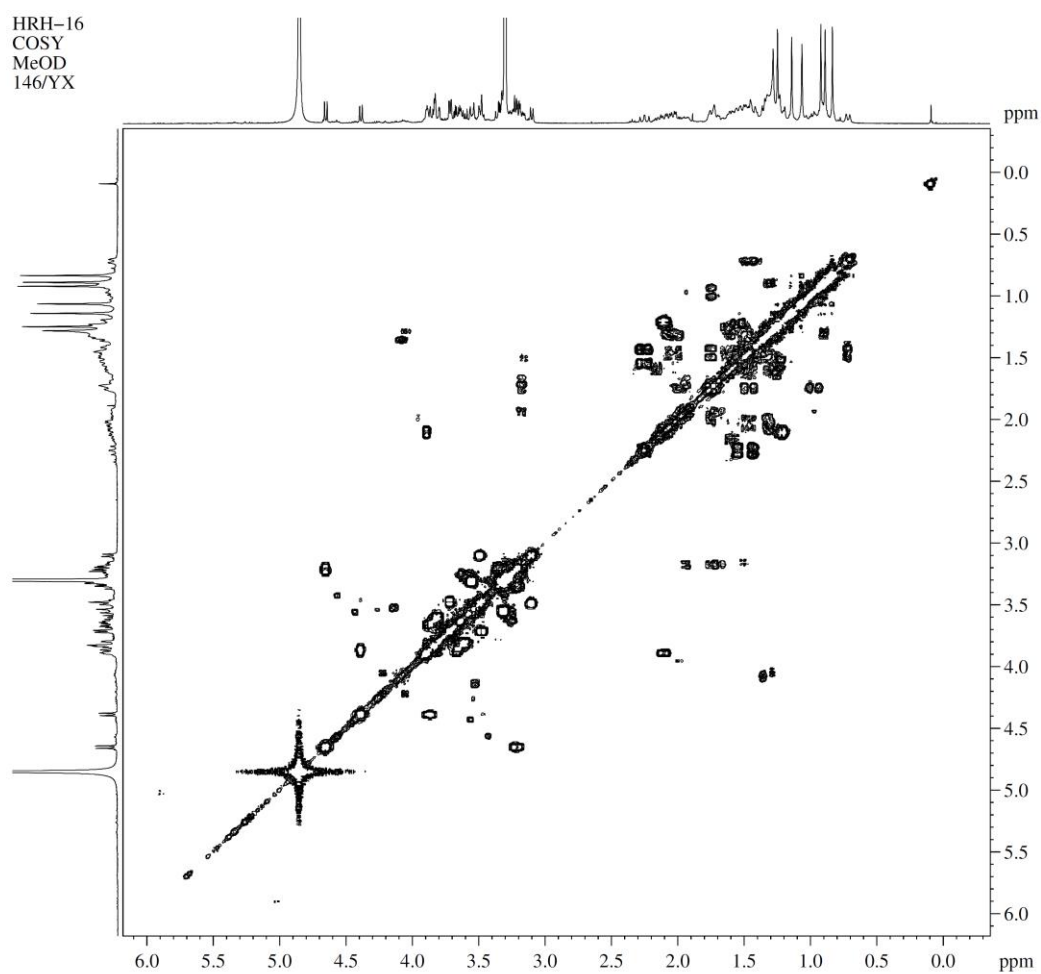

**Figure S25:**  $^1\text{H}$ - $^1\text{H}$  COSY spectrum of Compound **2**

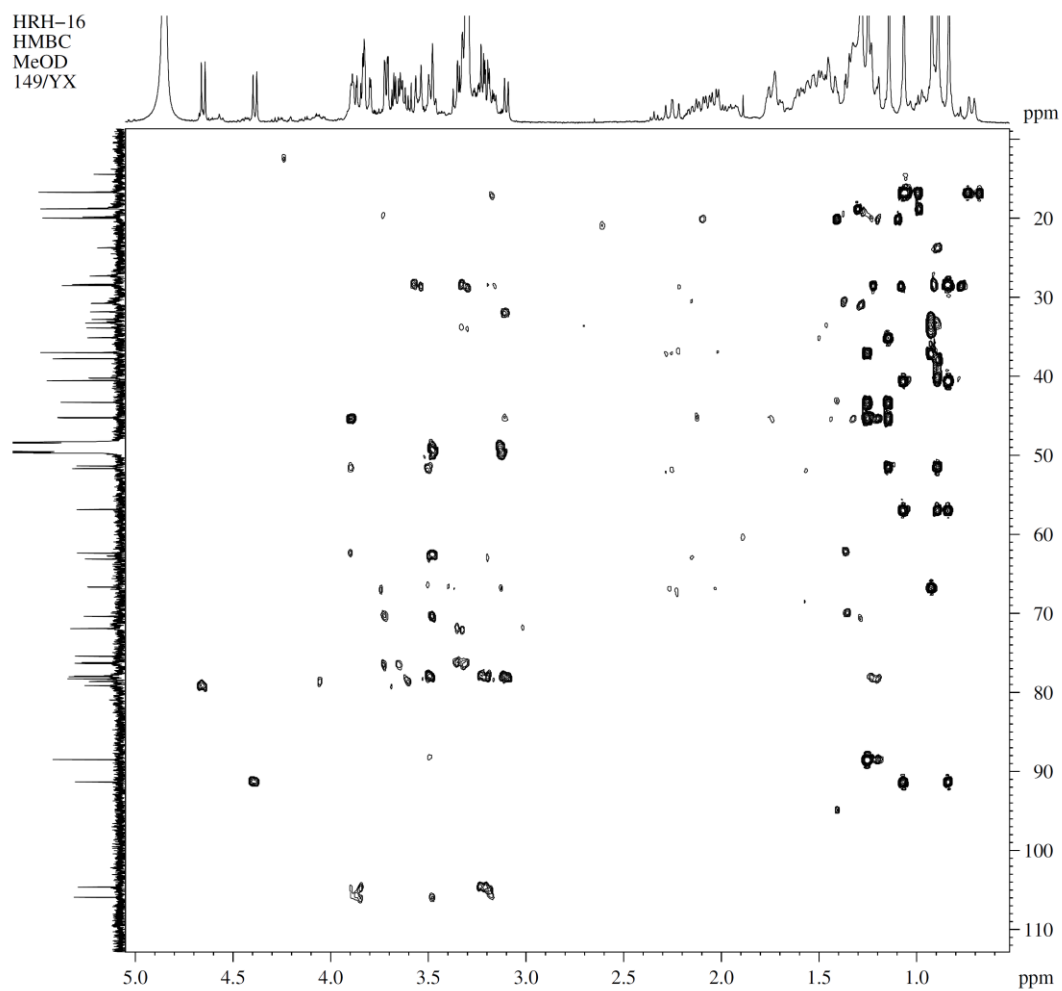

**Figure S26:** HMBC spectrum of Compound 2

HRH-16  
NOESY  
MeOD  
331/YX

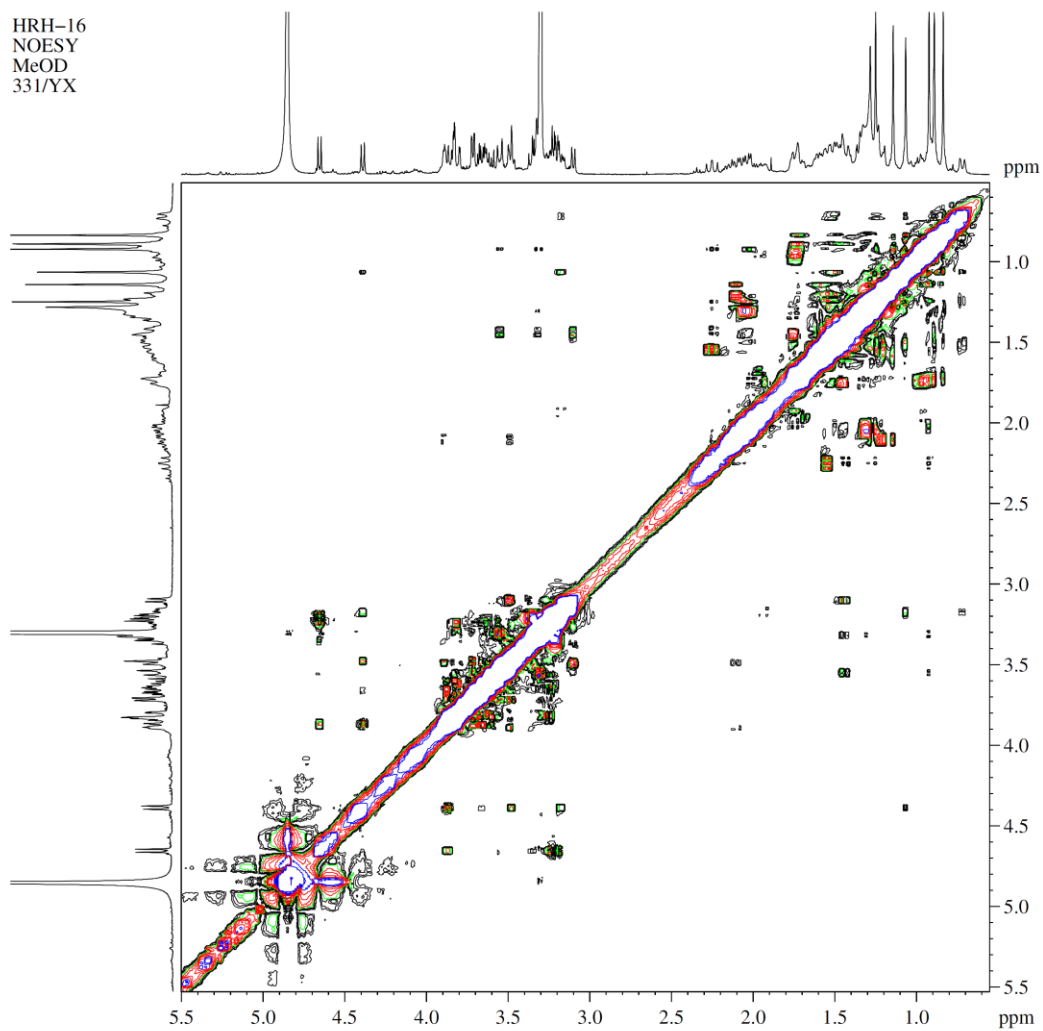

**Figure S27:** NOESY spectrum of Compound 2

HRH-16 #47 RT: 0.21 AV: 1 NL: 7.35E7  
T: FTMS + p ESI Full ms [100.0000-1500.0000]

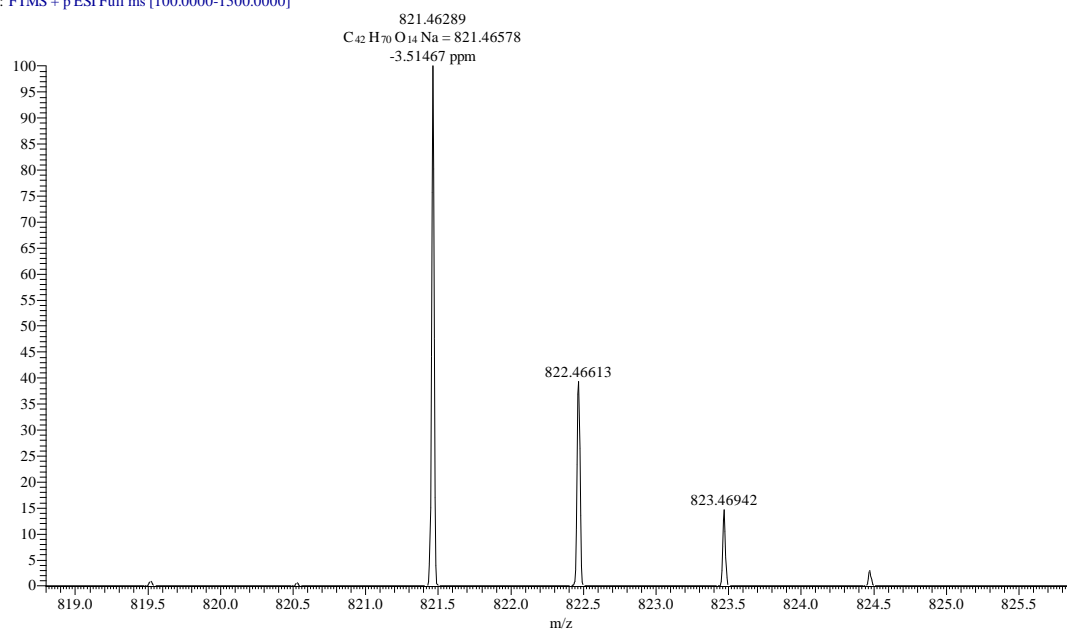

**Figure S28:** HR-ESI-MS spectrum of Compound 2

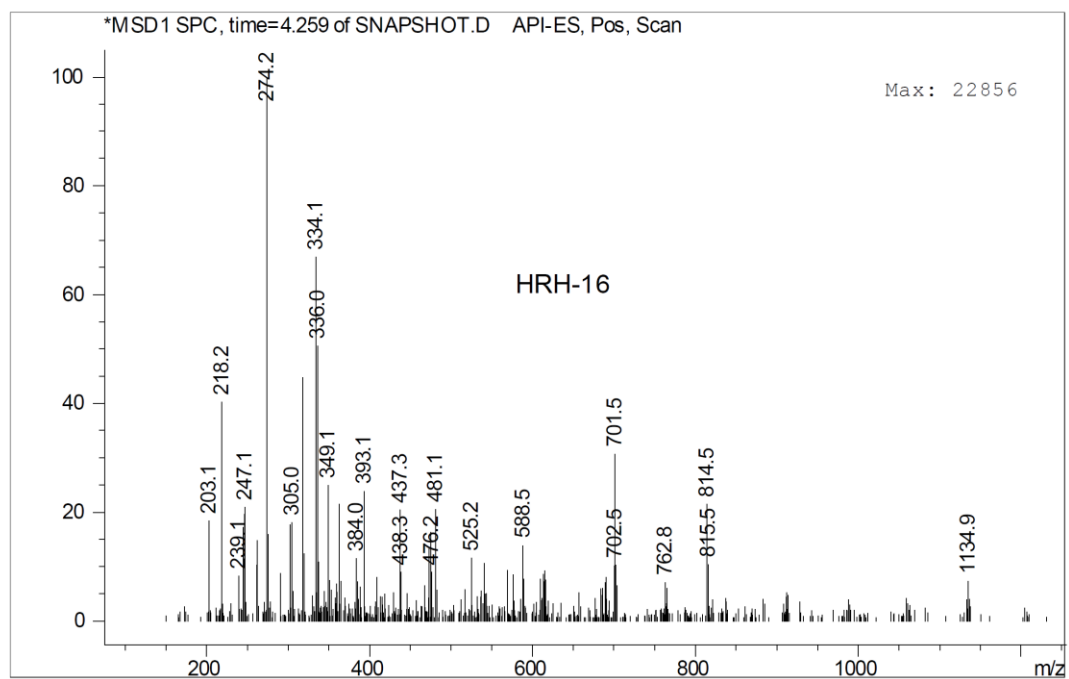

**Figure S29:** ESI-MS spectrum of Compound **2**



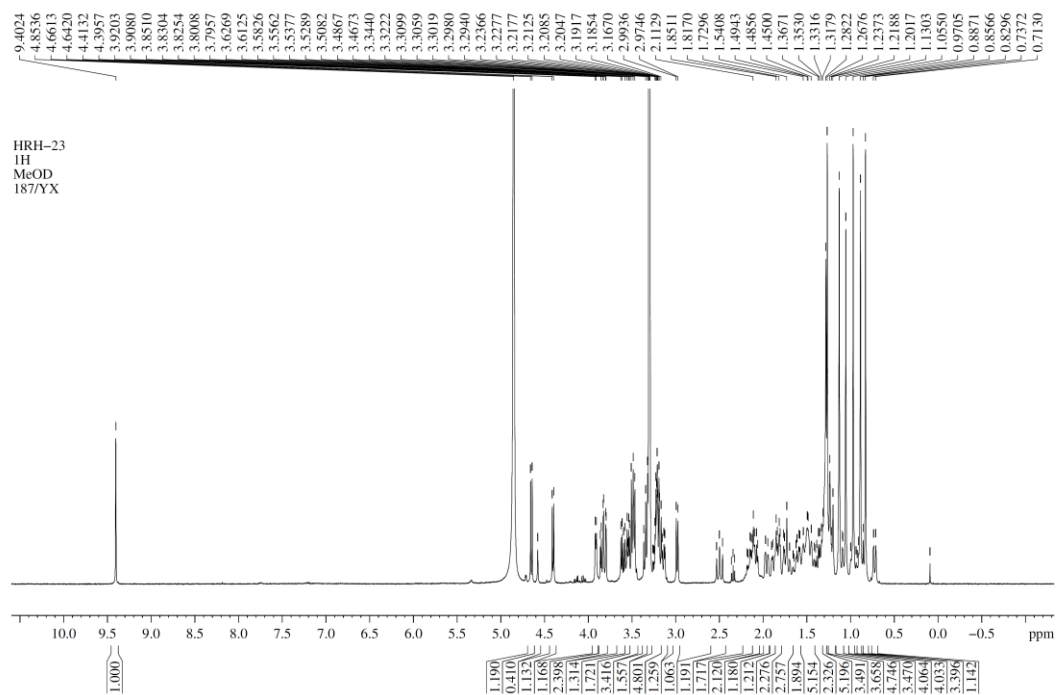

**Figure S30:**  $^1\text{H}$ -NMR spectrum of Compound **3**

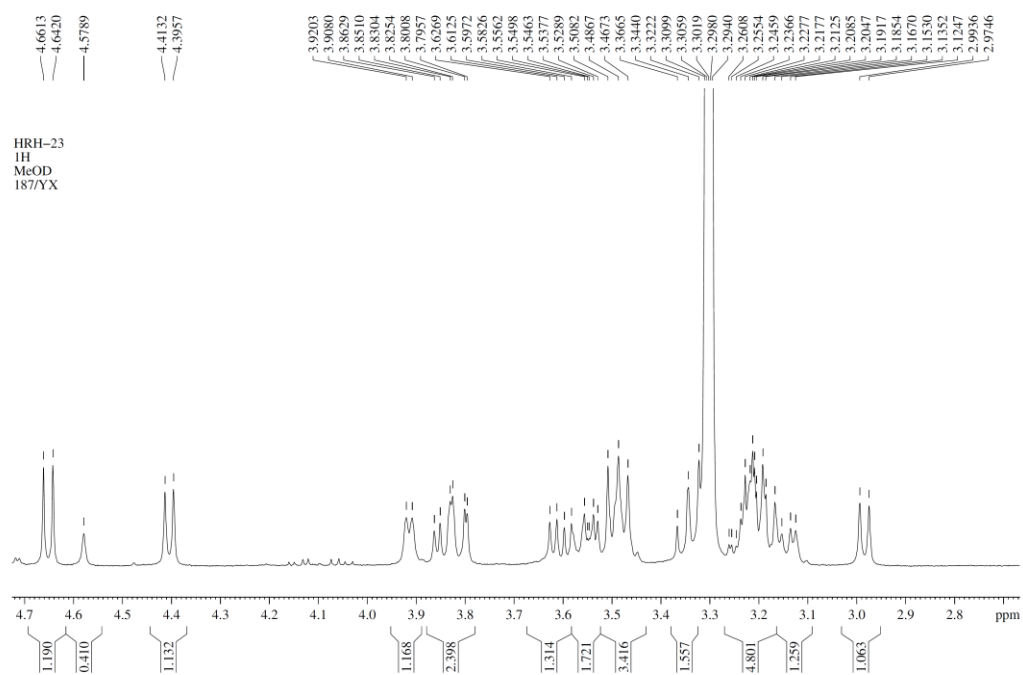

**Figure S31:**  $^1\text{H}$ -NMR extended spectrum of Compound **3**

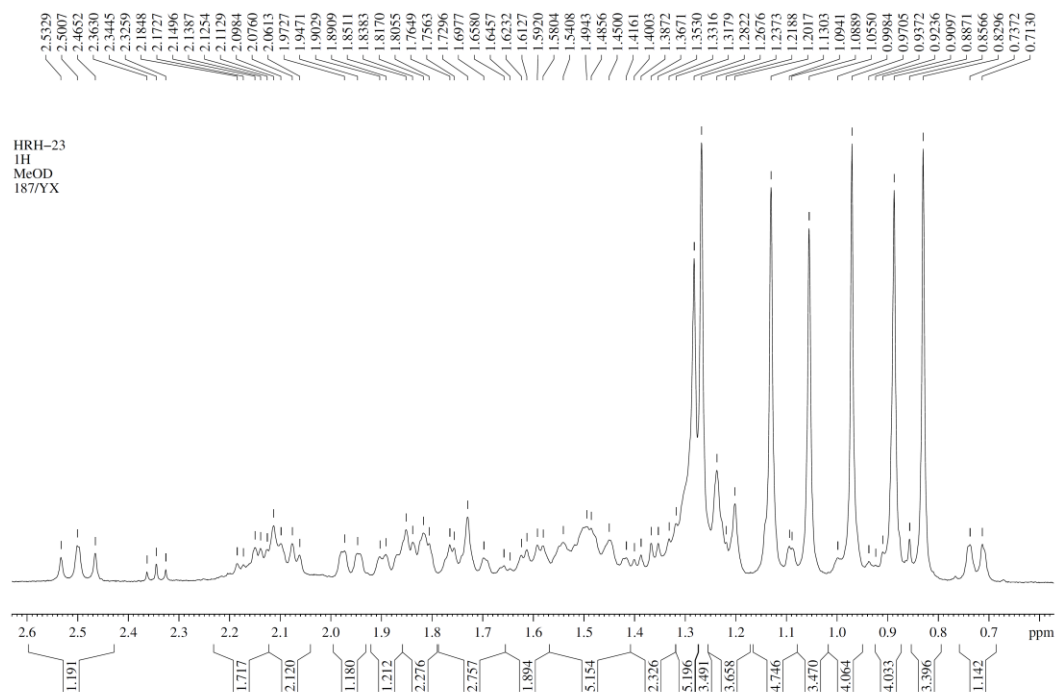

**Figure S32:**  $^1\text{H}$ -NMR extended spectrum of Compound **3**

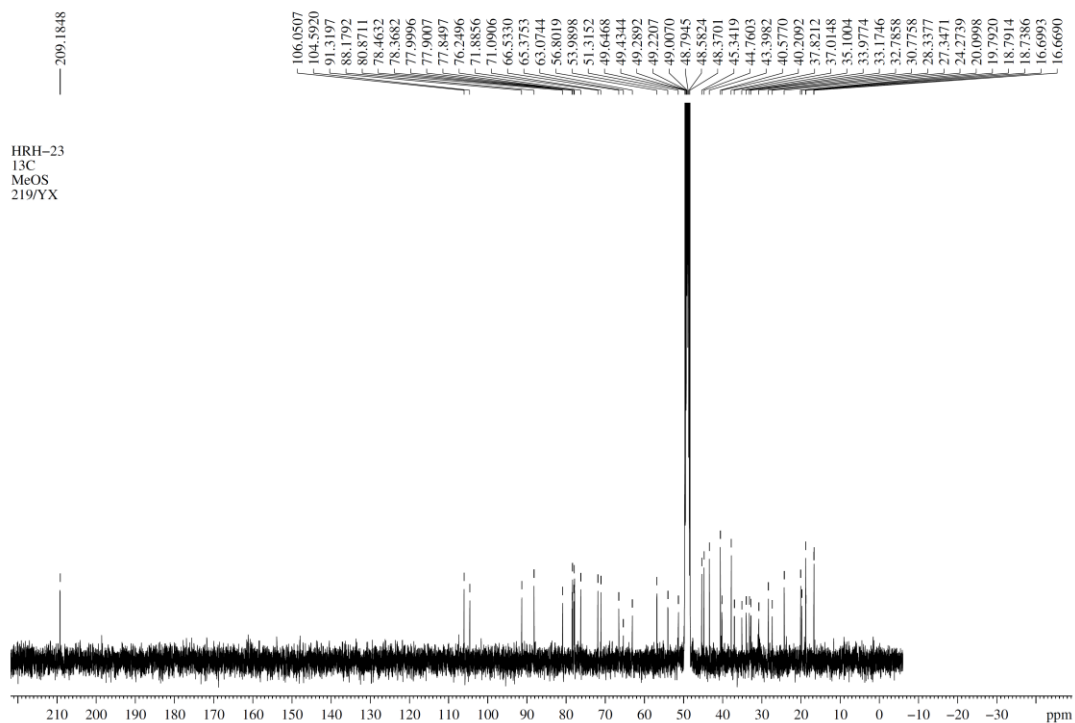

**Figure S33:**  $^{13}\text{C}$  NMR spectrum of Compound **3**

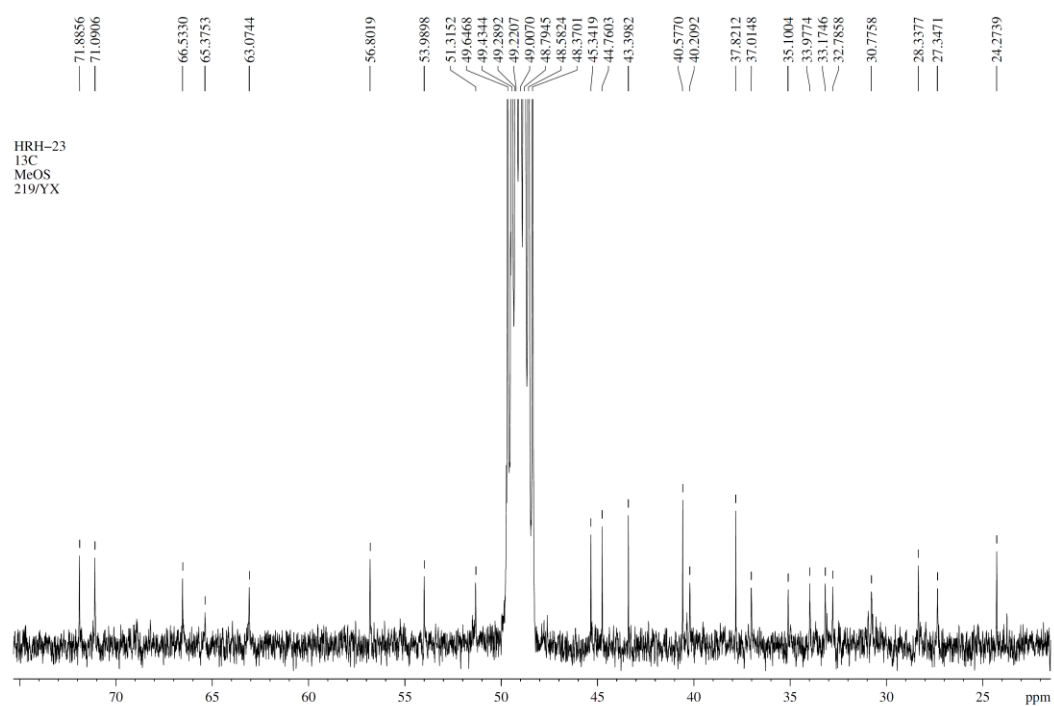

**Figure S34:**  $^{13}\text{C}$  NMR extended spectrum of Compound **3**

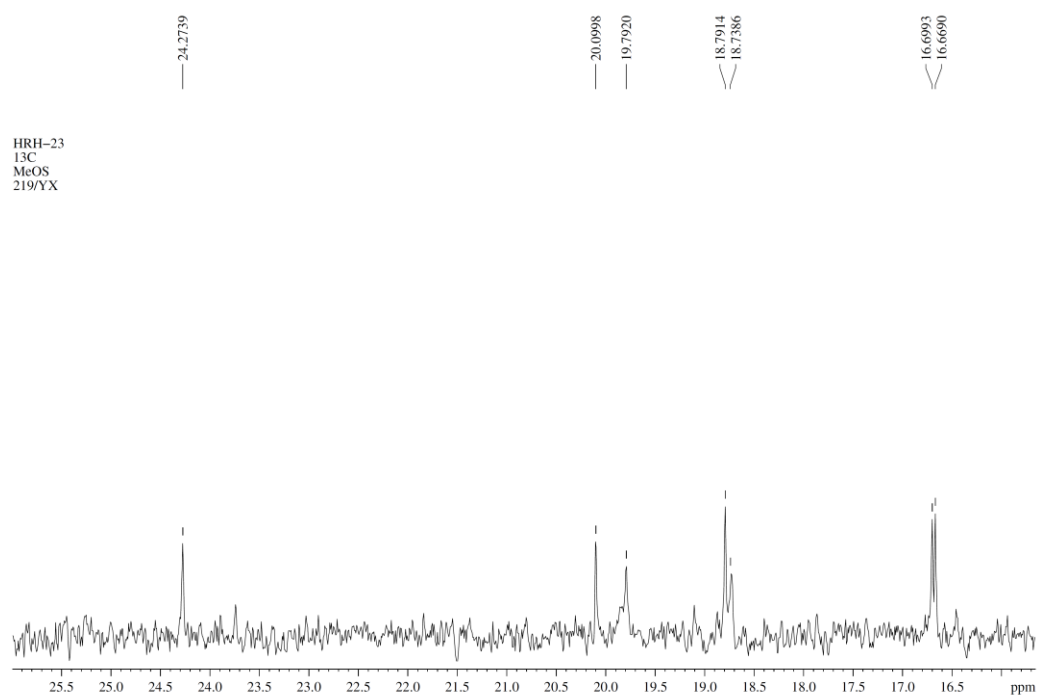

**Figure S35:**  $^{13}\text{C}$  NMR extended spectrum of Compound **3**

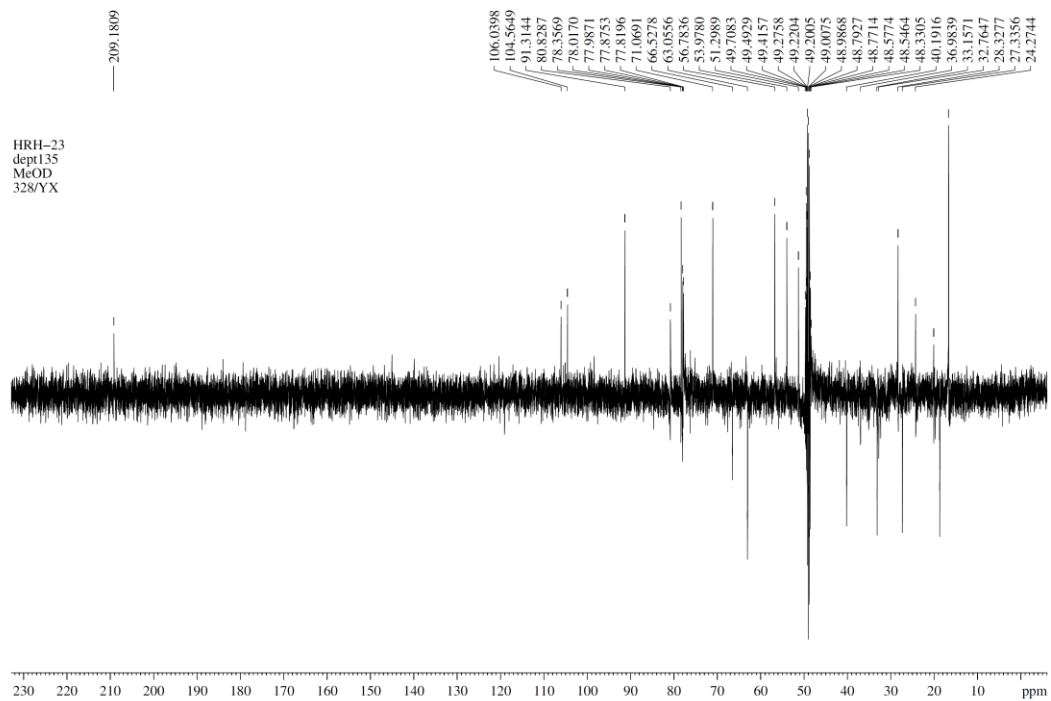

**Figure S36:** DEPT-135 spectrum of Compound **3**

HRH-23  
HSQC  
MeOD  
326/YX

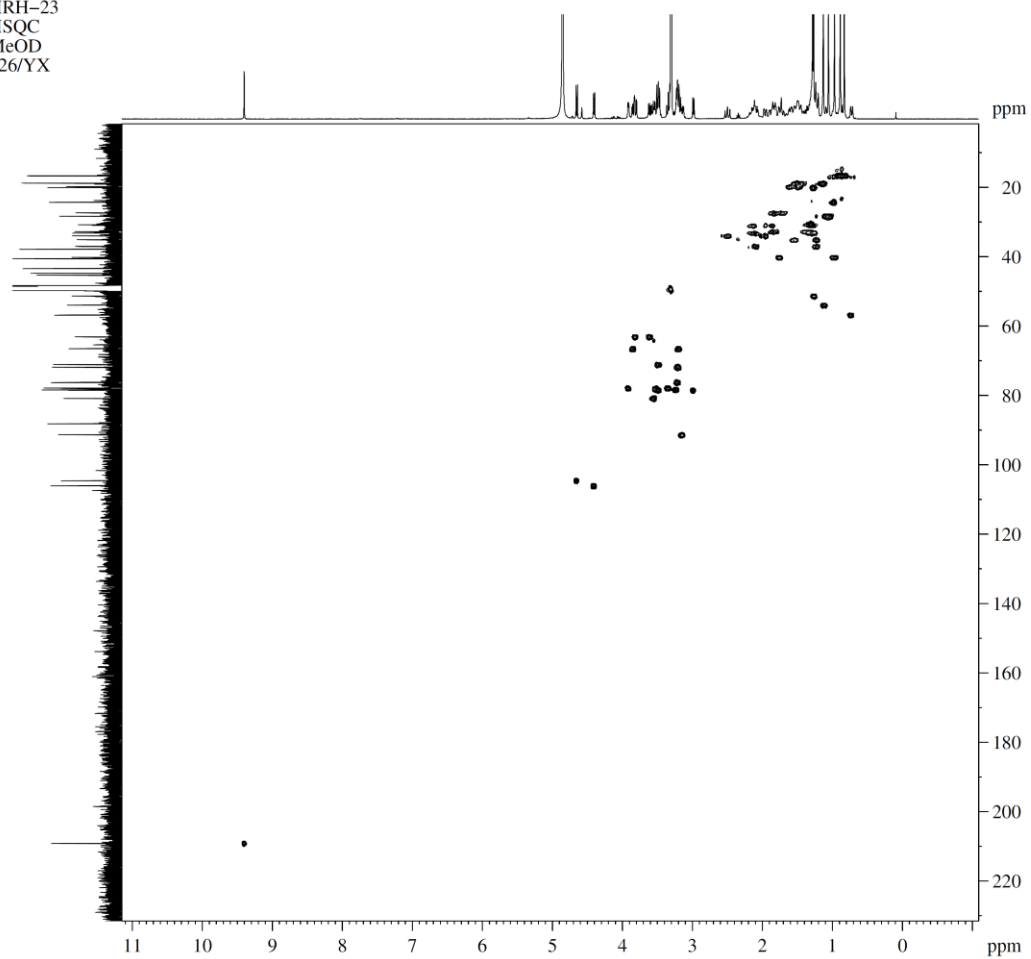

**Figure S37:** HSQC spectrum of Compound **3**



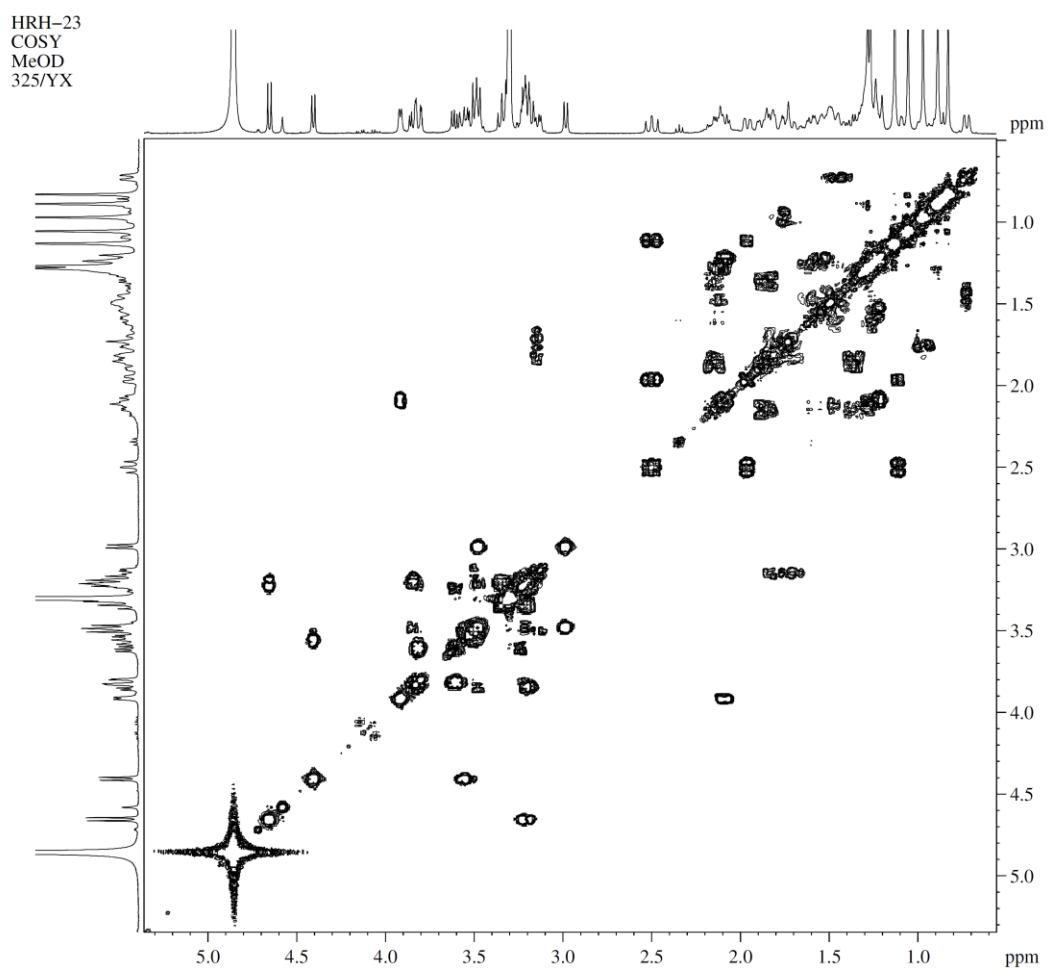

**Figure S38:**  $^1\text{H}$ - $^1\text{H}$  COSY spectrum of Compound **3**

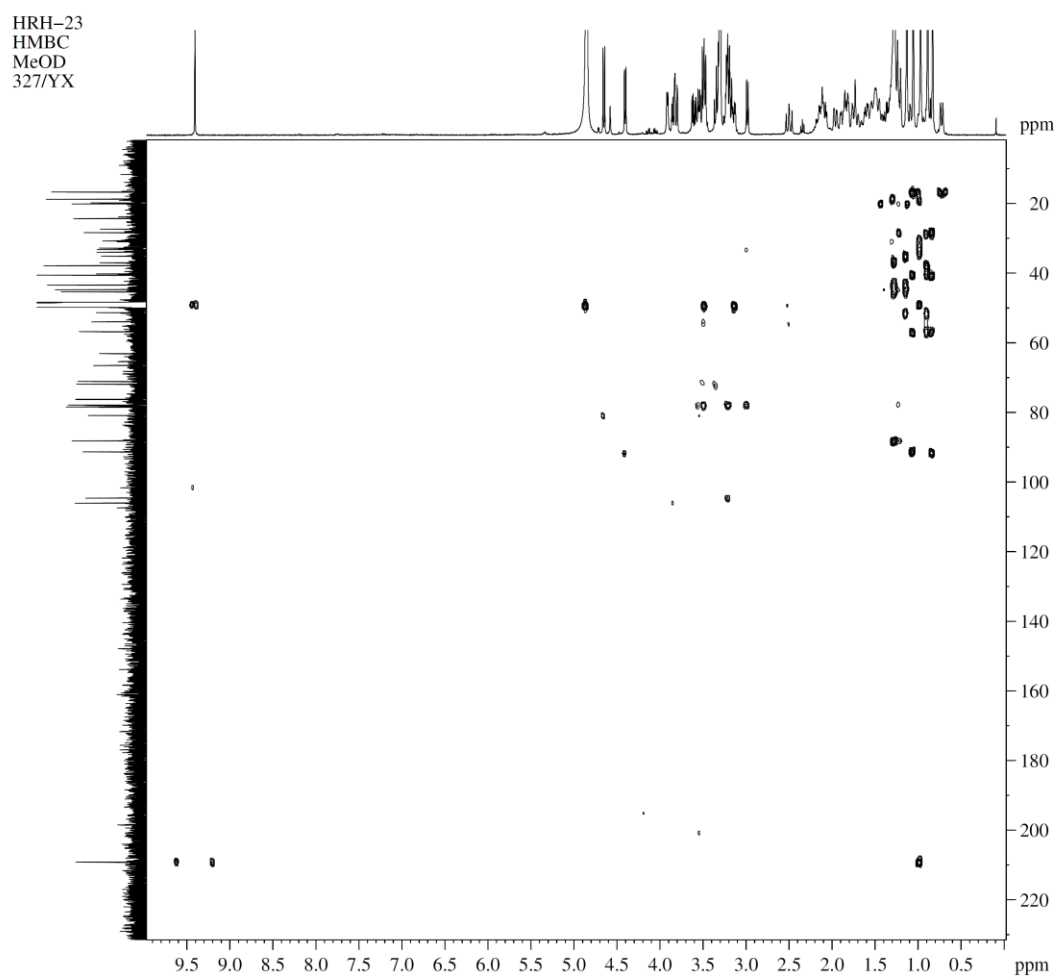

**Figure S39:** HMBC spectrum of Compound **3**

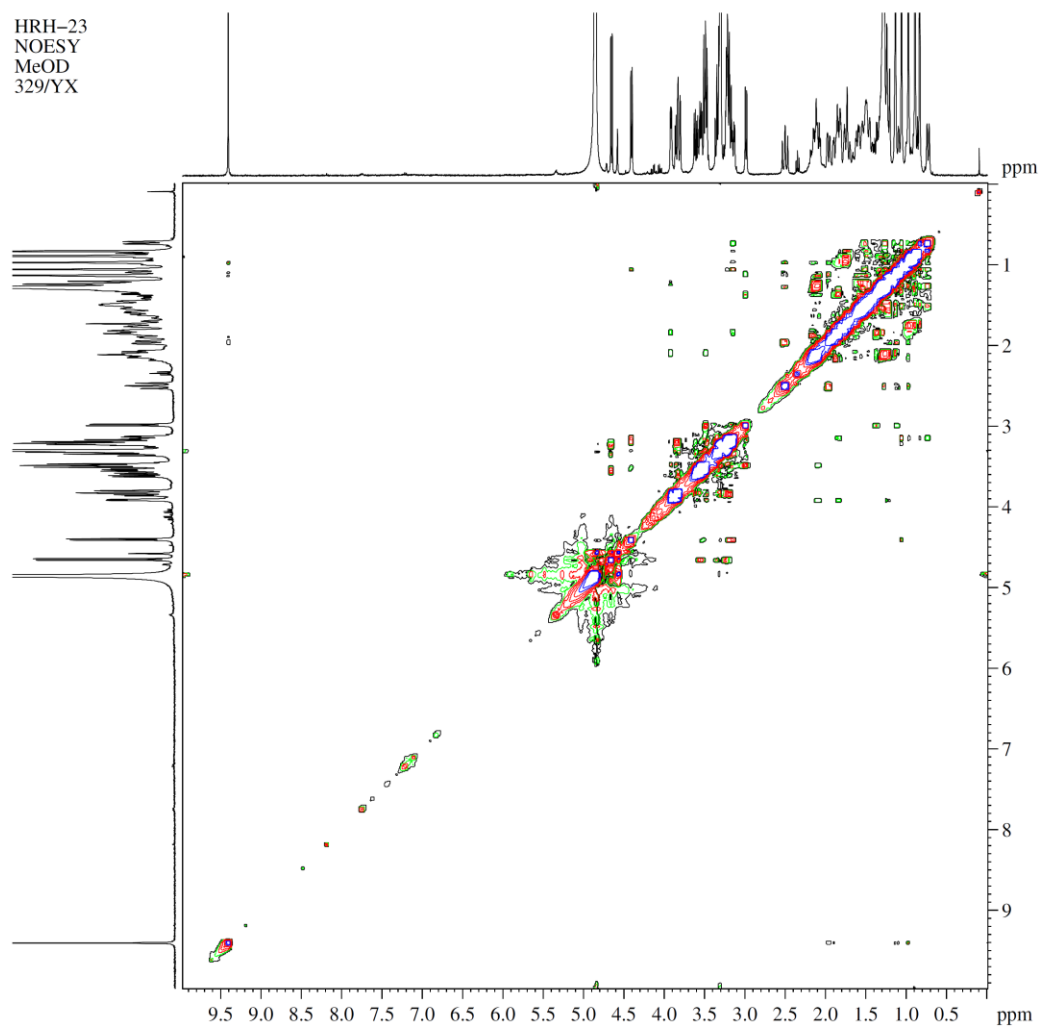

**Figure S40:** NOESY spectrum of Compound **3**

HRH-23 #91 RT: 0.40 AV: 1 NL: 9.77E6  
T: FTMS + p ESI Full ms [100.0000-1500.0000]

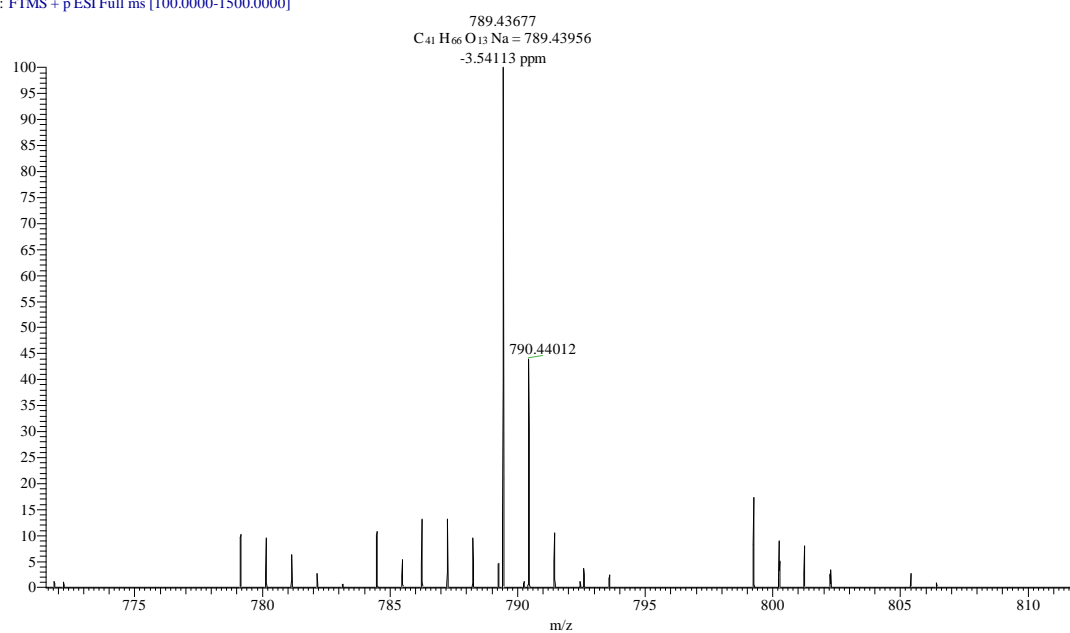

**Figure S41:** HR-ESI-MS spectrum of Compound **3**

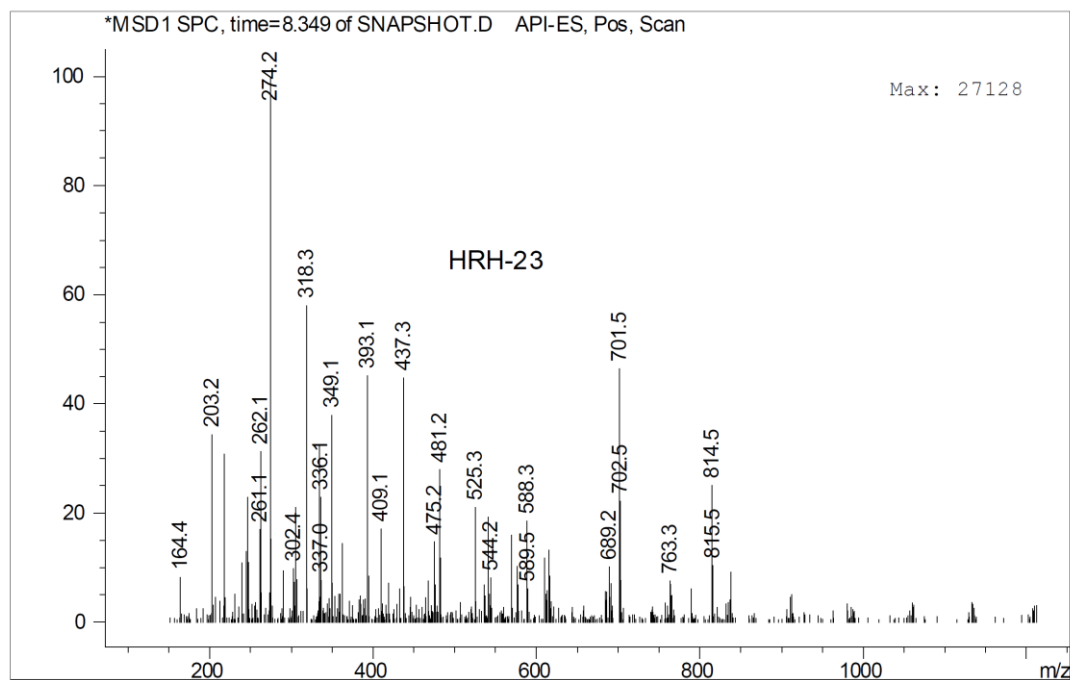

**Figure S42:** ESI-MS spectrum of Compound **3**

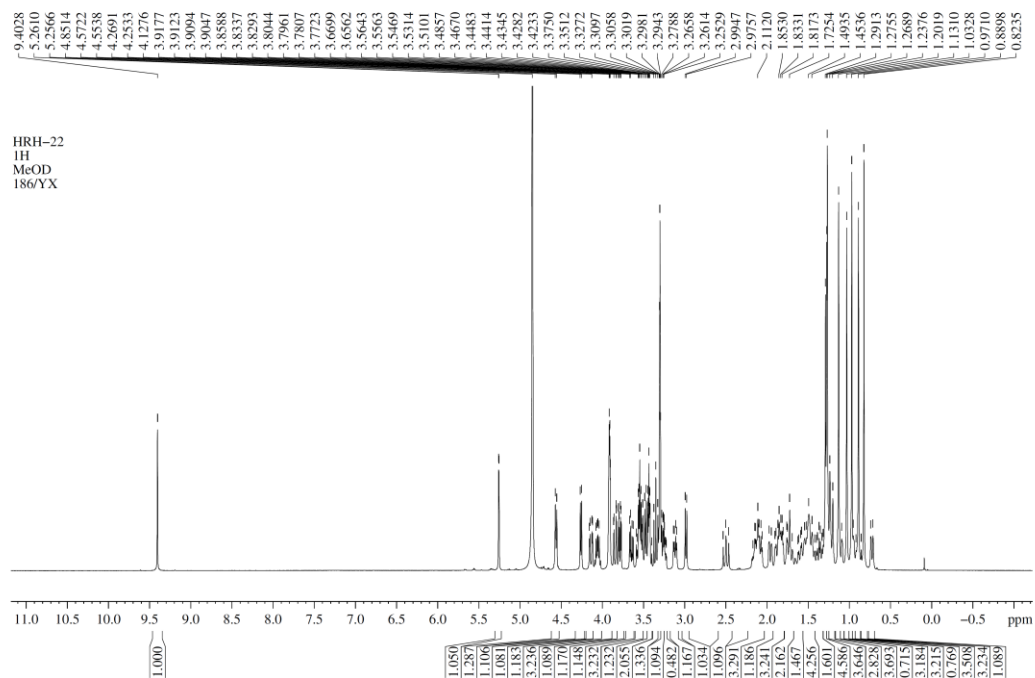

**Figure S43:**  $^1\text{H}$ -NMR spectrum of Compound **4**

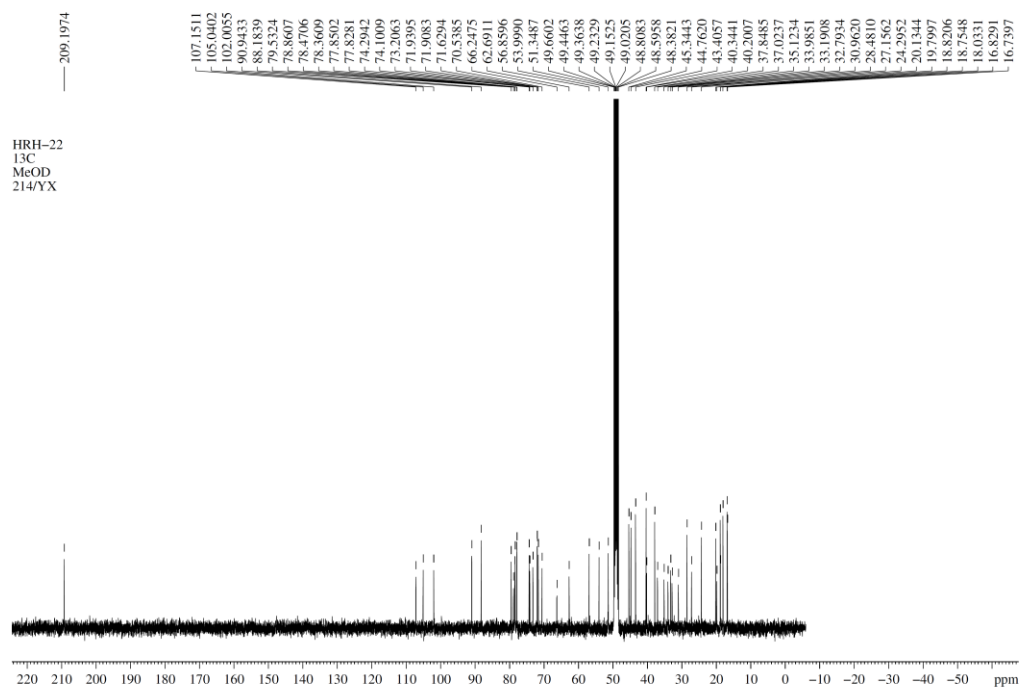

**Figure S44:**  $^{13}\text{C}$  NMR spectrum of Compound **4**

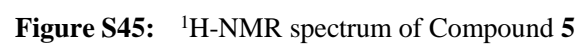

**Figure S45:**  $^1\text{H}$ -NMR spectrum of Compound **5**



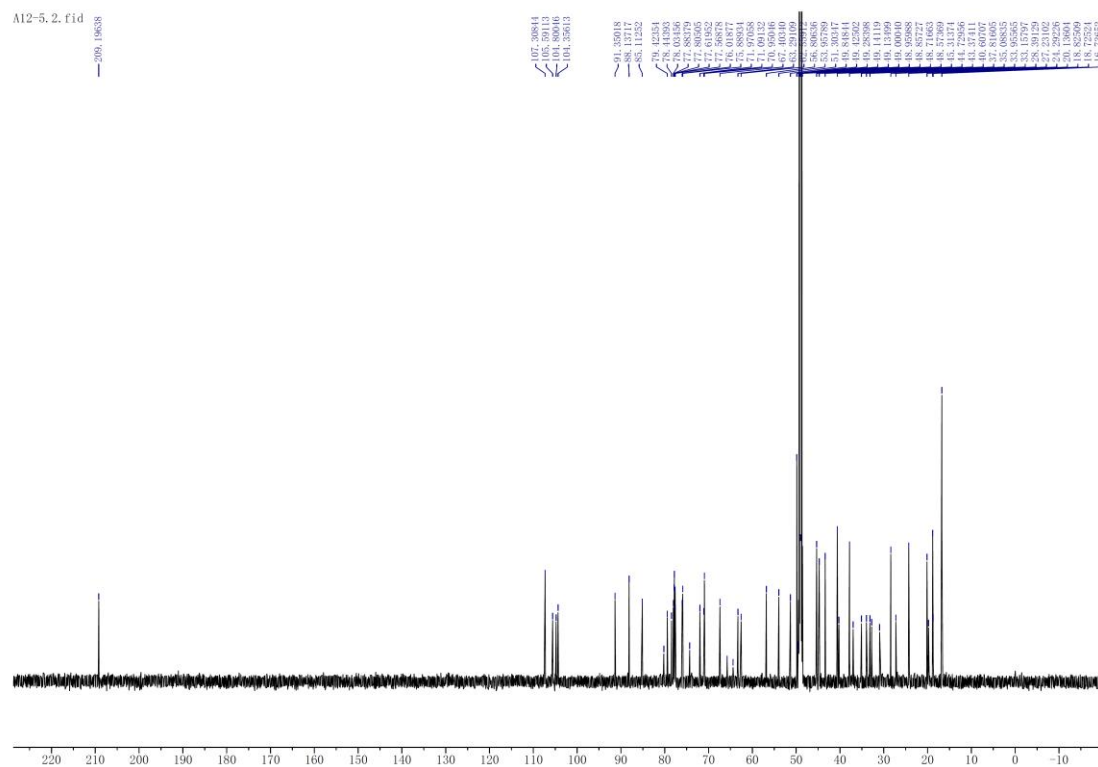

**Figure S46:**  $^{13}\text{C}$  NMR spectrum of Compound **5**

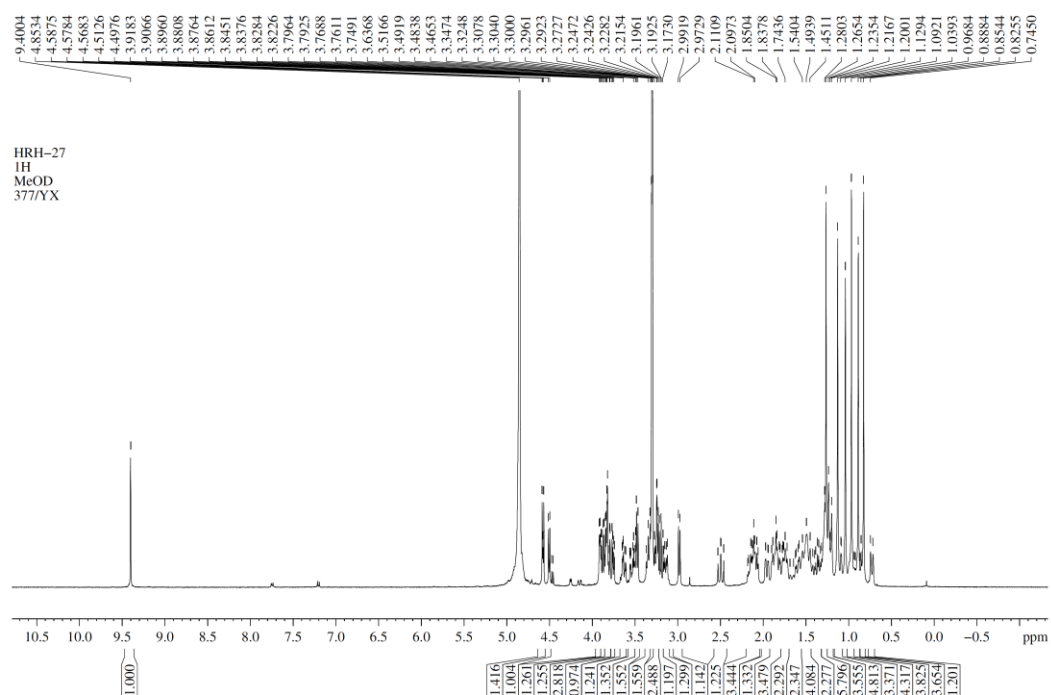

**Figure S47:**  $^1\text{H}$ -NMR spectrum of Compound **6**

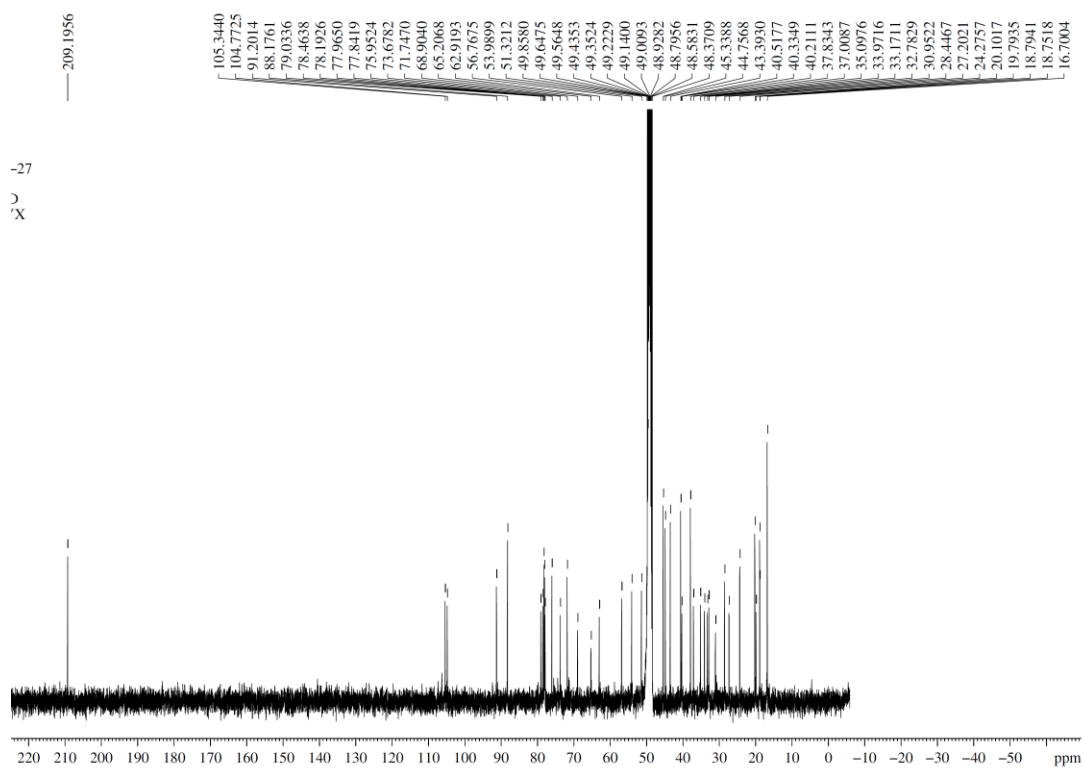

**Figure S48:**  $^{13}\text{C}$  NMR spectrum of Compound 6

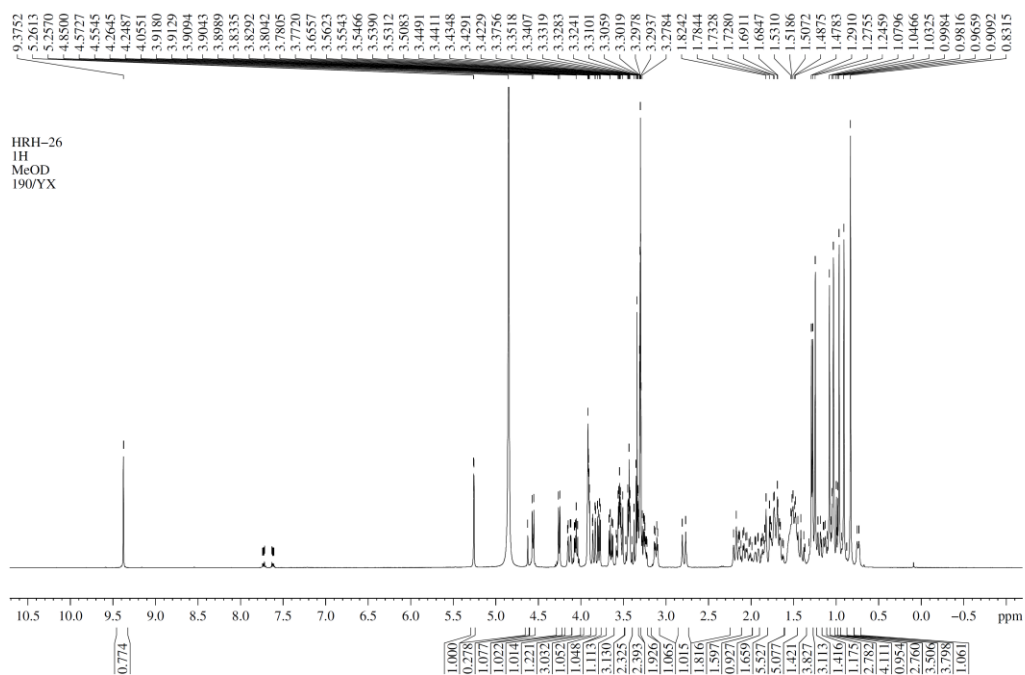

**Figure S49:**  $^1\text{H}$ -NMR spectrum of Compound **7**

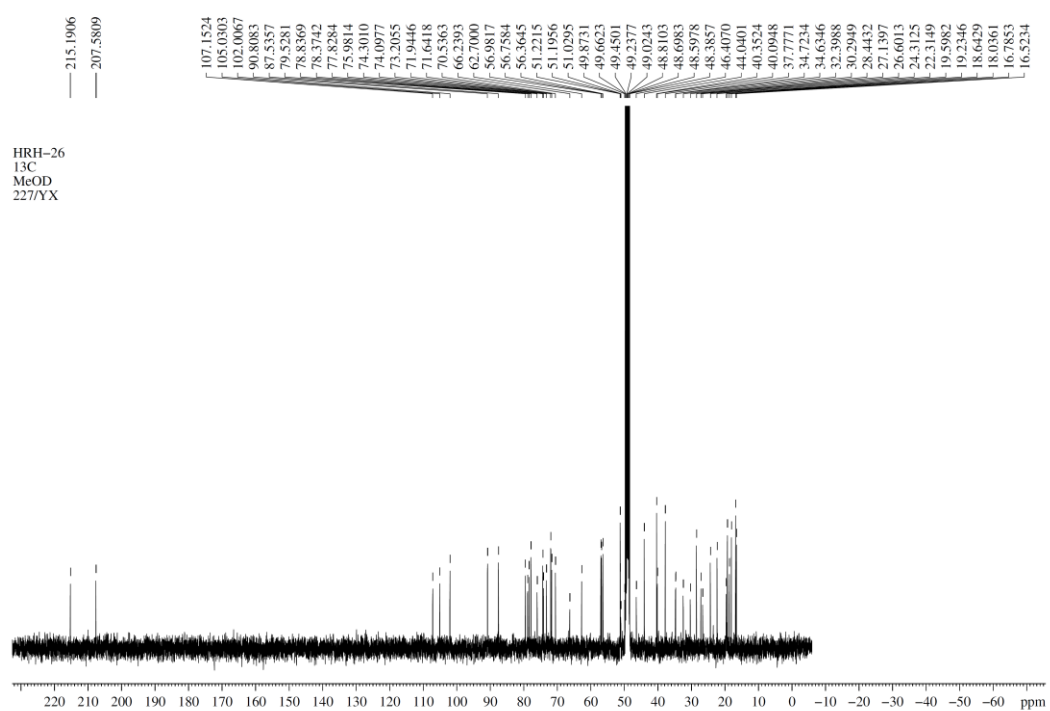

**Figure S50:**  $^{13}\text{C}$  NMR spectrum of Compound **7**

**Table S1** <sup>13</sup>C-NMR (100 MHz) Data of **4-7** in CD<sub>3</sub>OD

| Position       | <b>4</b> | <b>5</b> | <b>6</b> | <b>7</b> |
|----------------|----------|----------|----------|----------|
| <b>1</b>       | 37.8     | 40.2     | 40.2     | 37.8     |
| <b>2</b>       | 27.1     | 27.2     | 27.2     | 26.6     |
| <b>3</b>       | 90.9     | 91.3     | 91.2     | 90.8     |
| <b>4</b>       | 40.3     | 40.5     | 40.5     | 40.1     |
| <b>5</b>       | 56.8     | 56.8     | 56.7     | 57.0     |
| <b>6</b>       | 18.8     | 18.7     | 18.7     | 18.0     |
| <b>7</b>       | 35.1     | 33.9     | 35.1     | 34.6     |
| <b>8</b>       | 43.4     | 43.3     | 43.4     | 40.3     |
| <b>9</b>       | 54       | 51.3     | 51.3     | 51.2     |
| <b>10</b>      | 40.2     | 37.8     | 37.8     | 34.7     |
| <b>11</b>      | 19.8     | 19.8     | 19.8     | 19.5     |
| <b>12</b>      | 33.2     | 35.1     | 33.2     | 30.2     |
| <b>13</b>      | 88.1     | 88.1     | 88.2     | 87.5     |
| <b>14</b>      | 45.3     | 44.7     | 45.3     | 46.4     |
| <b>15</b>      | 37.0     | 37.0     | 37.0     | 44.0     |
| <b>16</b>      | 77.8     | 77.8     | 77.8     | 215.2    |
| <b>17</b>      | 44.7     | 45.3     | 44.7     | 56.3     |
| <b>18</b>      | 51.3     | 53.9     | 54.0     | 56.7     |
| <b>19</b>      | 34       | 30.9     | 34.0     | 32.3     |
| <b>20</b>      | 49       | 49.8     | 49.0     | 49.0     |
| <b>21</b>      | 31       | 33.1     | 30.9     | 28.4     |
| <b>22</b>      | 32.8     | 32.7     | 32.7     | 34.6     |
| <b>23</b>      | 28.5     | 16.7     | 28.4     | 27.1     |
| <b>24</b>      | 16.8     | 28.3     | 16.7     | 16.8     |
| <b>25</b>      | 16.7     | 16.7     | 16.7     | 16.5     |
| <b>26</b>      | 18       | 18.8     | 18.8     | 19.2     |
| <b>27</b>      | 20.1     | 20.1     | 20.1     | 22.3     |
| <b>28</b>      | 78.4     | 77.6     | 78.0     | 75.9     |
| <b>29</b>      | 24.3     | 24.3     | 24.2     | 24.3     |
| <b>30</b>      | 209.2    | 209.2    | 209.2    | 207.6    |
| <b>Ara-1</b>   | 107.1    | 104.8    | 104.8    | 107.1    |
| <b>Ara-2</b>   | 74.3     | 80.2     | 79       | 73.2     |
| <b>Ara-3</b>   | 73.2     | 74.3     | 73.6     | 74.3     |
| <b>Ara-4</b>   | 78.8     | 78.4     | 68.9     | 78.8     |
| <b>Ara-5</b>   | 66.2     | 65.0     | 65.2     | 66.2     |
| <b>Glc-1'</b>  | 105      | 104.3    | 105.3    | 105.0    |
| <b>Glc-2'</b>  | 79.5     | 85.1     | 75.9     | 77.8     |
| <b>Glc-3'</b>  | 78.3     | 77.8     | 78.4     | 79.5     |
| <b>Glc-4'</b>  | 71.6     | 71.1     | 71.7     | 71.6     |
| <b>Glc-5'</b>  | 77.8     | 79.4     | 78.2     | 78.3     |
| <b>Glc-6'</b>  | 62.7     | 62.6     | 62.9     | 62.7     |
| <b>Glc-1''</b> |          | 105.7    |          |          |
| <b>Glc-2''</b> |          | 76.0     |          |          |
| <b>Glc-3''</b> |          | 78.0     |          |          |
| <b>Glc-4''</b> |          | 72.0     |          |          |
| <b>Glc-5''</b> |          | 77.9     |          |          |
| <b>Glc-6''</b> |          | 63.2     |          |          |
| <b>Xyl-1</b>   |          | 107.3    |          |          |
| <b>Xyl-2</b>   |          | 75.8     |          |          |
| <b>Xyl-3</b>   |          | 77.5     |          |          |
| <b>Xyl-4</b>   |          | 70.9     |          |          |
| <b>Xyl-5</b>   |          | 67.4     |          |          |
| <b>Rha-1</b>   | 102      |          |          | 102.0    |
| <b>Rha-2</b>   | 71.9     |          |          | 71.9     |
| <b>Rha-3</b>   | 71.9     |          |          | 71.9     |

|              |      |      |
|--------------|------|------|
| <b>Rha-4</b> | 74.1 | 74.1 |
| <b>Rha-5</b> | 70.5 | 70.5 |
| <b>Rha-6</b> | 18.7 | 18.6 |

---
